# Supplementary material for: Mechanistic insights into the formation of oxenium ions and radical intermediates through the photolysis of phenylhydroxylamine and its derivatives
Source: Royal Society of Chemistry journal article supplement (doi:10.1039/c7cp07071c), 2017-12-18
Supplement: c7cp07071c1.pdf [file c7cp07071c1.pdf]

*Electronic Supplementary Information for:*

# **Mechanistic Insights into the Formation of Oxenium Ion and Radical Intermediates through the Photolysis of Phenylhydroxylamine and its Substitutes**

Yumei Yang, Weihai Fang and Xuebo Chen \*

Key Laboratory of Theoretical and Computational Photochemistry of Ministry of Education, †  
Department of Chemistry, Beijing Normal University, Xin-wai-da-jie No. 19, Beijing, 100875, People's  
Republic of China

Email: xuebochen@bnu.edu.cn

## **Contents**

Section 1. Molecular orbitals of **1**, **2** and **3** (Figure S-1.1 to S-1.3)

Section 2. Schematic structures with selective parameters

Section 3. MEPs for the photolysis of **1** and **2** leading to produce HBD

Section 4. Charge Translocation Calculations and Solvent effects

Section 5. Tables (S5-1 to S5-6)

Section 6. Cartesian Coordinates

## Section 1. Molecular orbitals

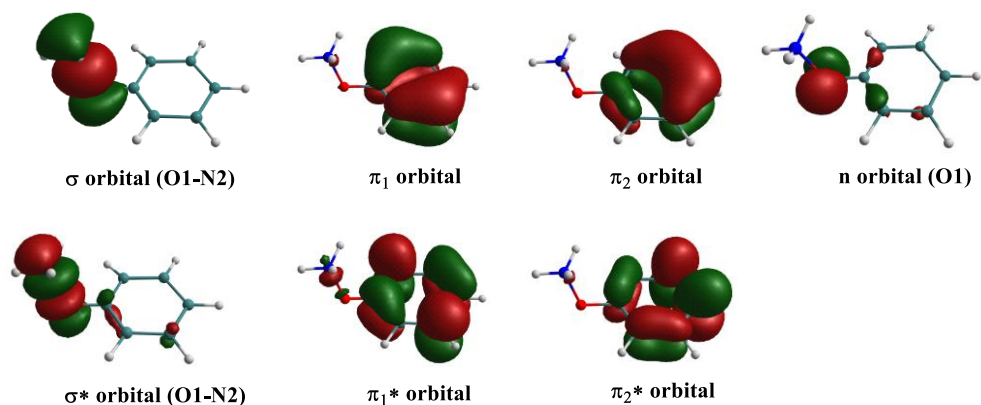

**Figure S-1.1** Molecular orbitals of phenylhydroxylamine (1) used in defining the active space for the CASSCF(8e/7o)/CASPT2 calculations.

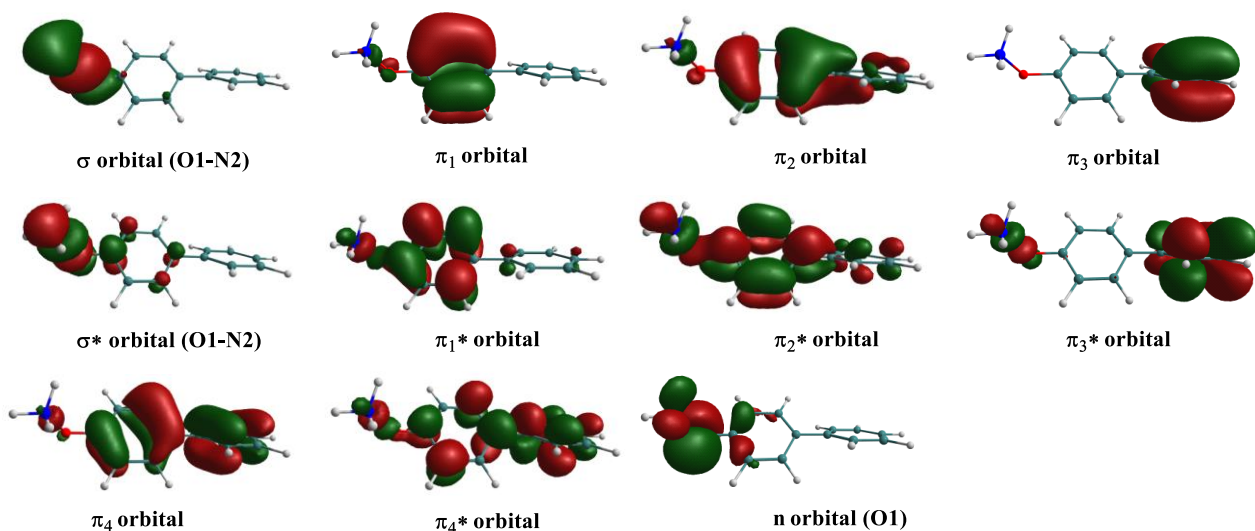

**Figure S-1.2** Molecular orbitals of para-biphenyl-hydroxylamine (2) used in defining the active space for the CASSCF(12e/11o)/CASPT2 calculations.

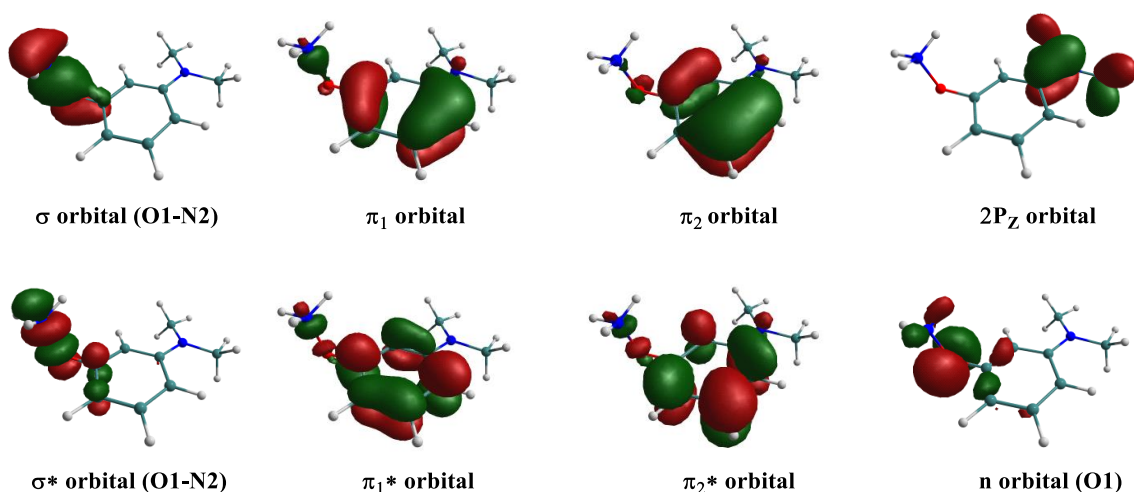

**Figure S-1.3** Molecular orbitals of m-dimethylamino phenylhydroxylamine (3) used in defining the active space for the CASSCF(10e/8o)/CASPT2 calculation.

## Section 2. Schematic structures with selective parameters

Figure S-2.1 The schematic structures of 1, 2 and 3.

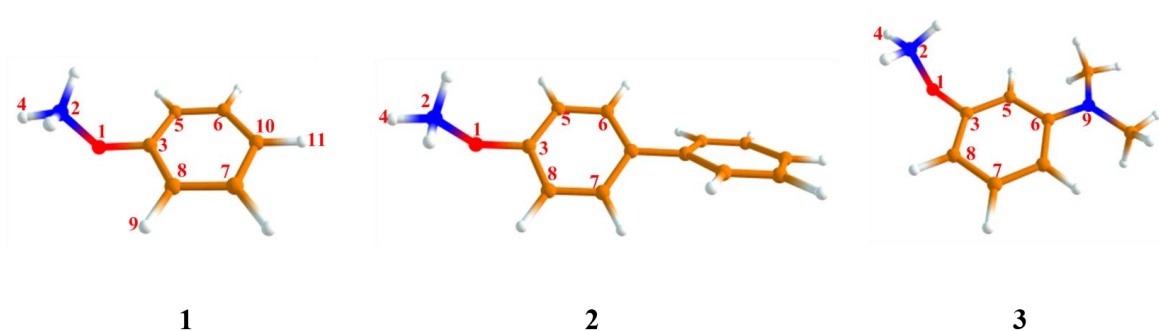

Figure S-2.2.1 Schematically critical points with the key bond lengths/distances ( $\text{\AA}$ ) for 1 to produce oxenium ion from the CASSCF(8e/7o) calculations.

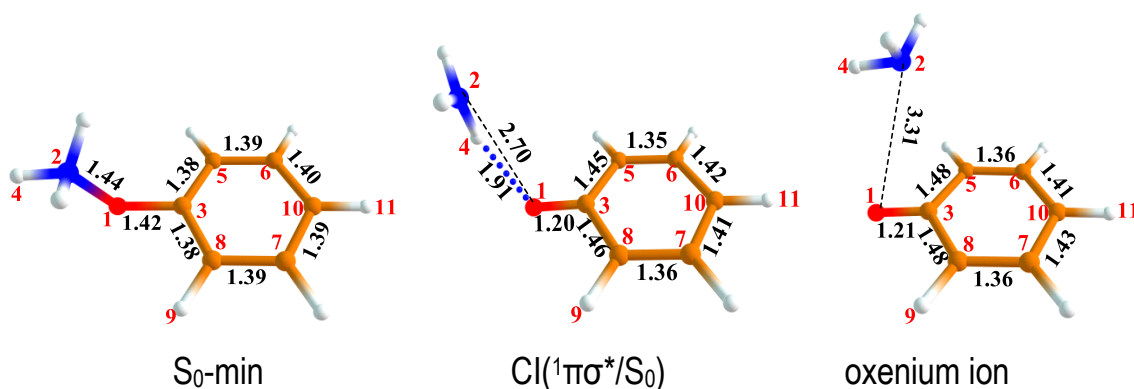

Figure S-2.2.2 Schematically critical points with the key bond lengths/distances ( $\text{\AA}$ ) and angle ( $^\circ$ ) for 1 to produce HBD from the CASSCF(8e/7o) calculations.

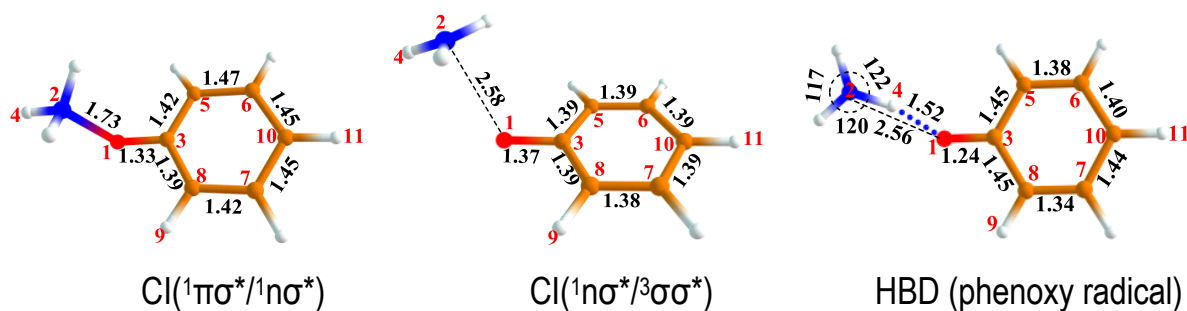

Figure S-2.3.1 Schematically critical points with the key bond lengths/distances ( $\text{\AA}$ ) and angle ( $^\circ$ ) for 2 to produce oxenium ion (closed-shell singlet ground state) obtained from the CASSCF(12e/11o) calculation.

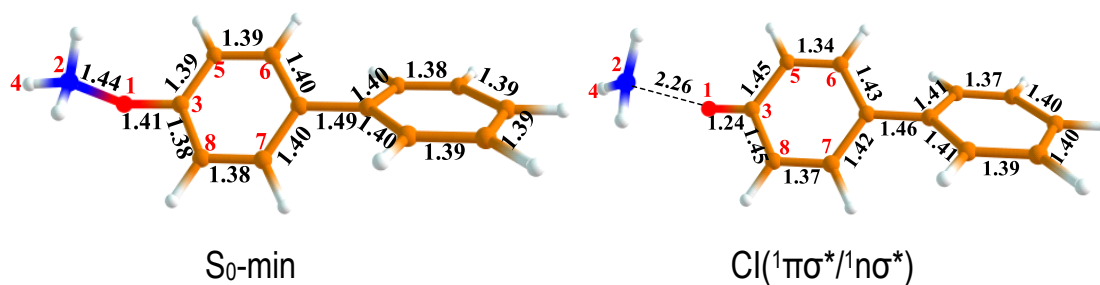

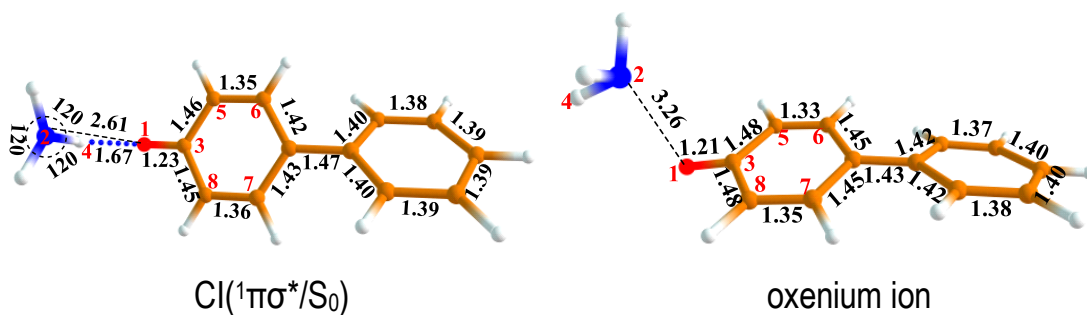

**Figure S-2.3.2** Schematically critical points with the key bond lengths/distances (Å) and angle (°) for **2** to produce HBD obtained from the CASSCF(12e/11o) calculation.

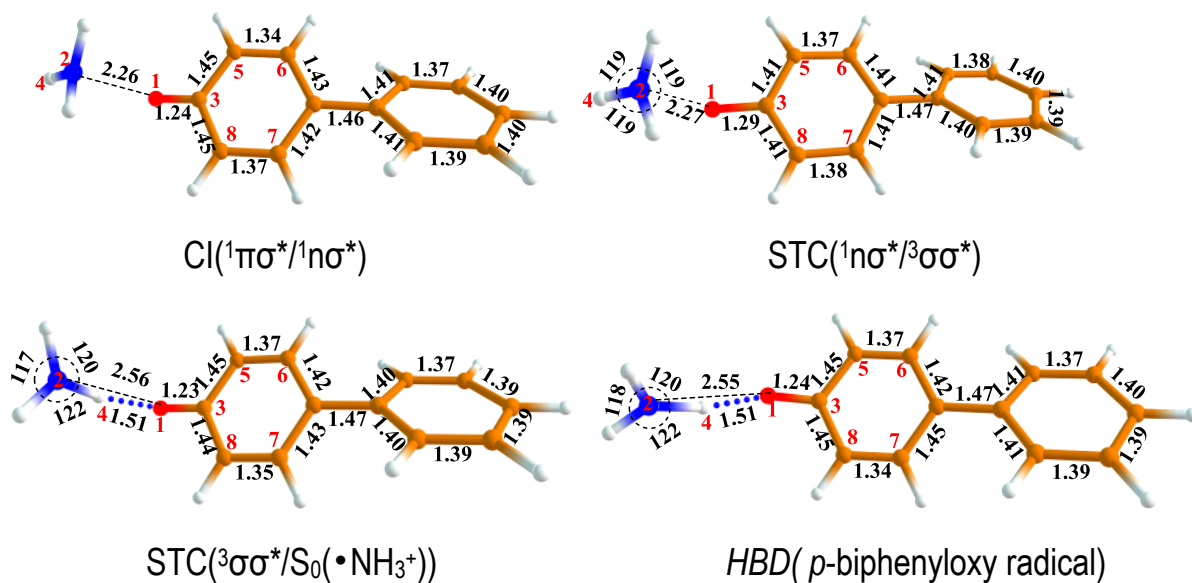

**Figure S-2.3.3** Schematically critical points with the key bond lengths/distances (Å) for **2** to yield triplet state oxenium ion obtained from the CASSCF(12e/11o) calculation.

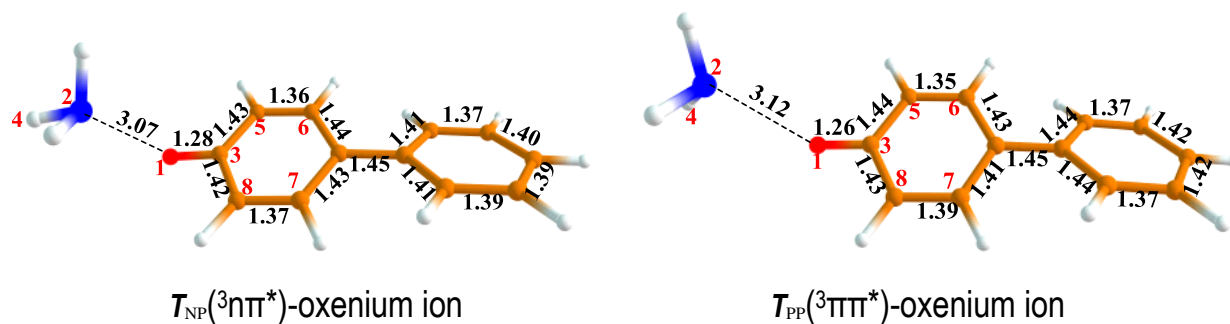

**Figure S-2.4** Schematically critical points with the key bond lengths/distances (Å) for **3** to yield oxenium ion (closed-shell singlet ground state) obtained from the CASSCF(10e/8o) calculation.

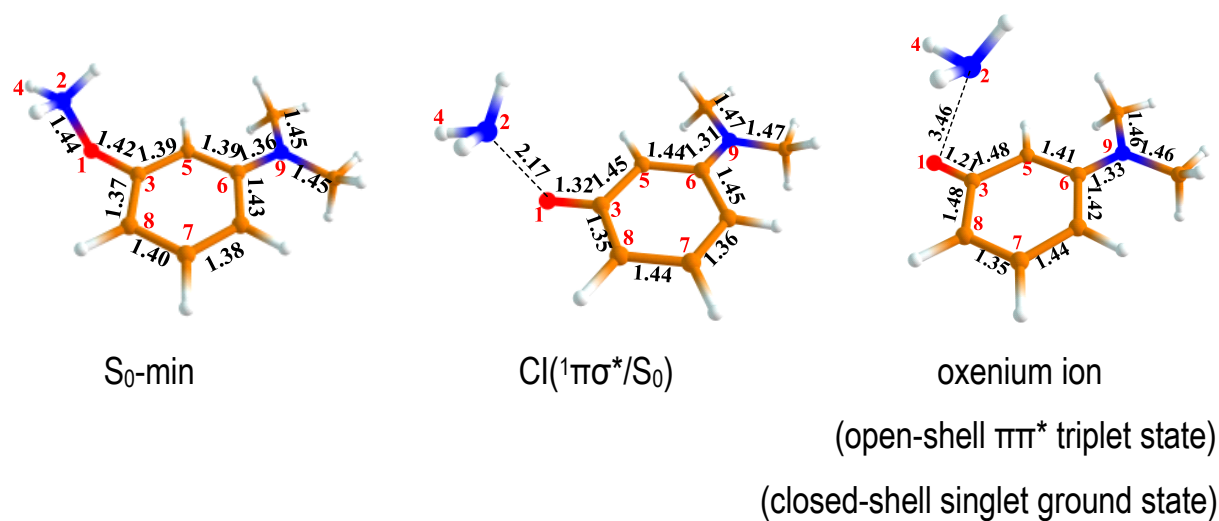

**Figure S-2.5** Schematically critical points with the key bond lengths/distances (Å) for the *para*, *ortho* nucleophilic (a, b) and radical (c, d) addition reactions for parent molecule **1** respectively along the predefined reaction coordinates on the full three-dimensional PESs computed at CASPT2//CASSCF(8,7)/6-31G\*\* level of theory.

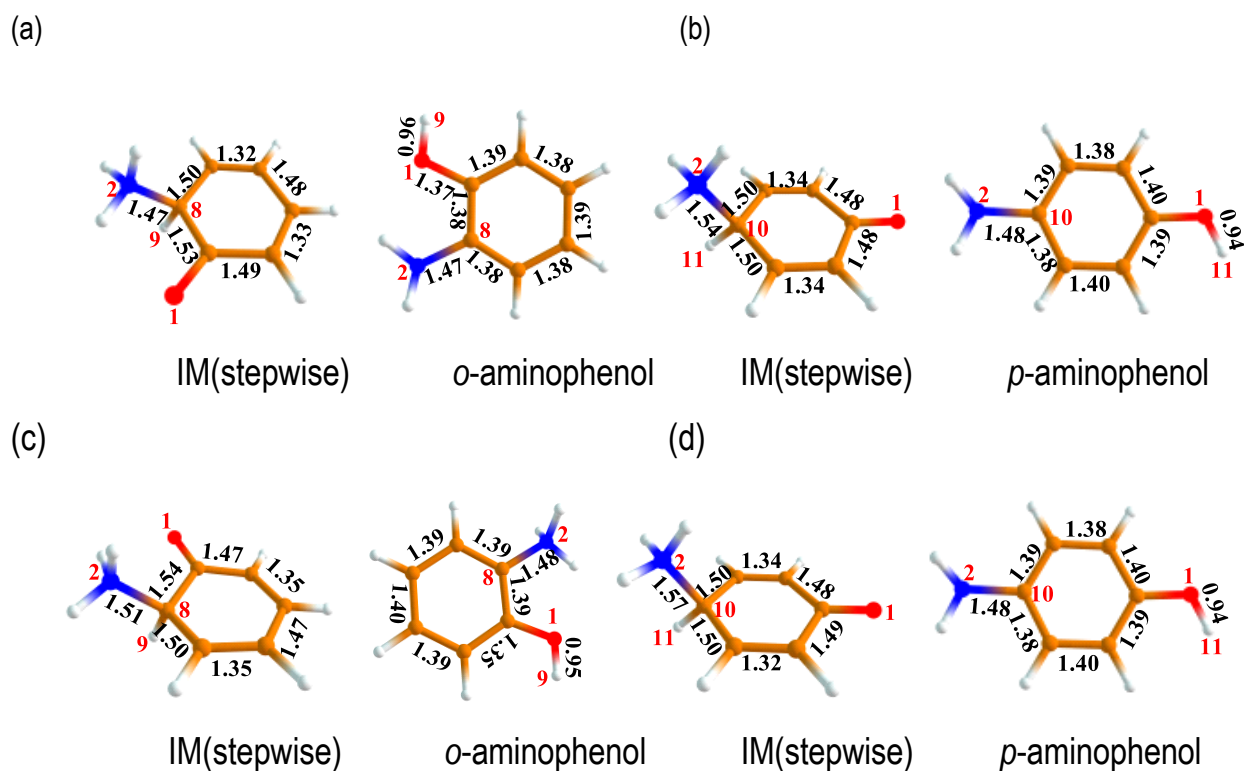

## Section 3. MEPs for the photolysis of 1 and 2 leading to the hydrogen-bonded-diradical (HBD)

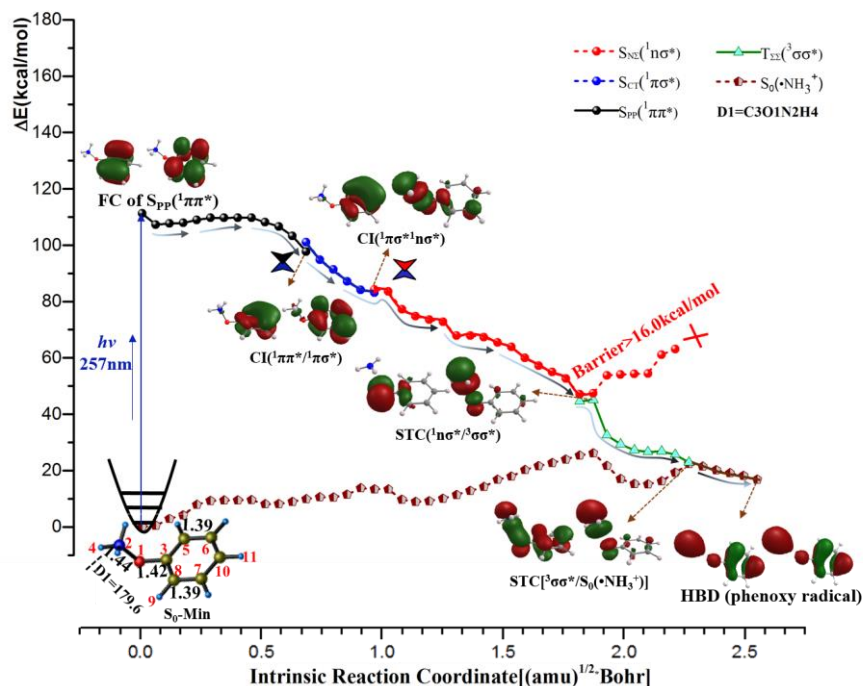

**Figure S-3.1** The MEPs with the evolution of singly occupied orbitals for the photolysis of **1** leading to the HBD along the reaction channels of singlet, triplet and ground states calculated at the CASPT2//IRC/CASSCF/6-31G\*\* level of theory.

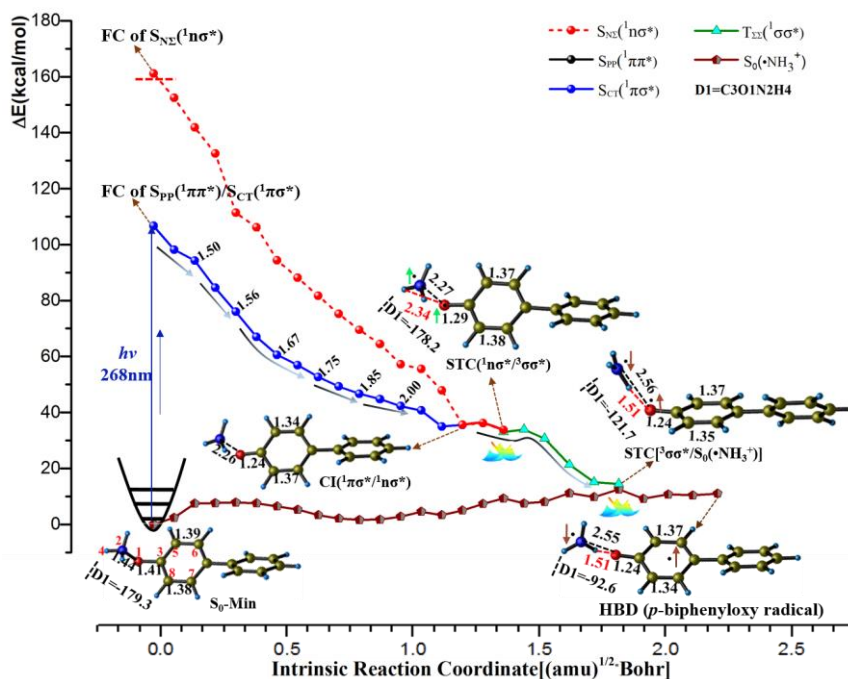

**Figure S-3.2** MEPs for the photolysis of **2** leading to the HBD along the reaction channels of singlet, triplet and ground states calculated at the CASPT2//IRC/CASSCF/6-31G\*\* level of theory. Selected stationary structures are given with

their key bond lengths and the C3O1N2H4 (D1) dihedral angles in degree. The structural evolution of O1-N2 distance (Å) are provided along the relaxation paths.

#### Section 4. Charge Translocation Calculations and Solvent Effects

To further explore the properties of **1-3** in the excited state, a charge translocation calculation was performed based on Mulliken charge population and an appropriate fragment partition strategy. As shown in Figure S4-1, the phenyl ring is defined as part 1, while the rest moiety of the  $NH_3$  group is defined as part 2. The charge distributions were obtained using a full Mulliken population analysis at the CASPT2//CASSCF level of theory. Table S4-1 present the Mulliken charge distributions of parts 1 and 2 in the ground ( $S_0$ ) and  $S_{CT}(^1\pi\sigma^*)$  state upon the photo-excitation of **1-3**. {Charge translocation: oxenium ion(part2-part1)- $S_0$ (part2-part1)}/2

**Figure S4-1.** The scheme of fragment partition for charge translocation calculation is shown in which the phenyl ring is defined as part 1, while the rest moiety of the  $NH_3$  group is defined as part 2.

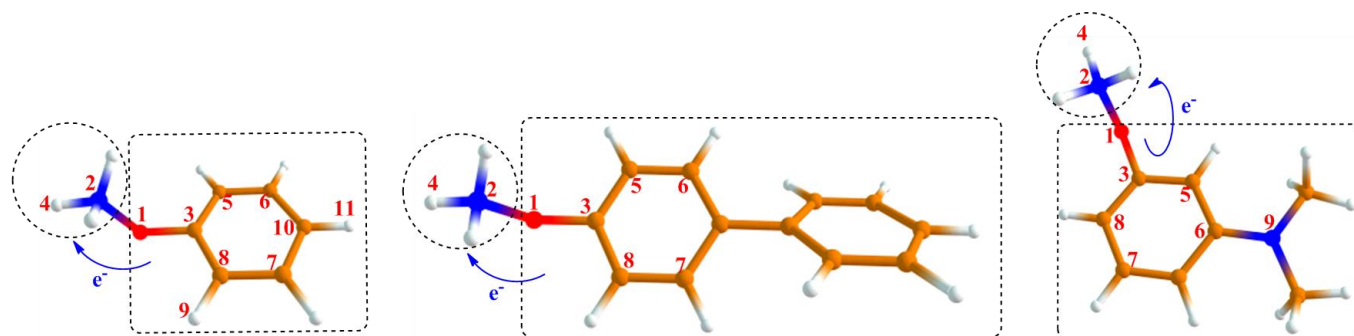

**Table S4-1.** Mulliken charge distribution for **1**, **2** and **3** in parts 1 and 2 in the ground ( $S_0$ ) and the products of oxenium ion upon the photo-excitation. (unit: e)

|          |        | $S_0$ | Oxenium ion | Charge translocation |
|----------|--------|-------|-------------|----------------------|
| <b>1</b> | Part 1 | 0.059 | 0.975       | -0.916               |
|          | Part 2 | 0.941 | 0.025       |                      |
| <b>2</b> | Part 1 | 0.063 | 0.989       | -0.926               |
|          | Part 2 | 0.937 | 0.011       |                      |
| <b>3</b> | Part 1 | 0.066 | 0.981       | -0.915               |
|          | Part 2 | 0.934 | 0.019       |                      |

**Table S4-2.** Vertical excitation energy ( $\Delta E$ , kcal/mol), oscillator strength ( $f$ ), dipole moment (D.M., Debye), and the character of singly occupied orbital for different transition of phenylhydroxylamine (1), para-biphenyl-hydroxylamine (2) and *m*-dimethylamino phenylhydroxylamine (3) calculated at the CASPT2/CASSCF/PCM level of theory in water ( $\epsilon=78.3$ ), acetonitrile ( $\epsilon=36.6$ ) and methanol ( $\epsilon=32.6$ ) matrix at a temperature of 298.15 K.

| Species | Transition                                   | Water | Acetonitrile | Methanol | Singly occupied orbitals |            |
|---------|----------------------------------------------|-------|--------------|----------|--------------------------|------------|
| 1       | $S_0 \rightarrow S_{PP}(^1\pi\pi^*)$         | 102.1 | 102.1        | 102.1    | $\pi$                    | $\pi^*$    |
|         | $S_0 \rightarrow S_{P\Sigma}(^1\pi\sigma^*)$ | 114.6 | 114.5        | 114.5    | $\pi$                    | $\sigma^*$ |
|         | $S_0 \rightarrow S_{N\Sigma}(^1n\sigma^*)$   | 158.5 | 158.5        | 158.5    | n                        | $\sigma^*$ |
| 2       | $S_0 \rightarrow S_{PP}(^1\pi\pi^*)$         | 103.7 | 105.3        | 106.2    | $\pi$                    | $\pi^*$    |
|         | $S_0 \rightarrow S_{P\Sigma}(^1\pi\sigma^*)$ | 99.4  | 99.2         | 99.7     | $\pi$                    | $\sigma^*$ |
|         | $S_0 \rightarrow S_{N\Sigma}(^1n\sigma^*)$   | 163.7 | 164.0        | 164.3    | n                        | $\sigma^*$ |
| 3       | $S_0 \rightarrow S_{PP}(^1\pi\pi^*)$         | 109.4 | 109.3        | 109.3    | $\pi$                    | $\pi^*$    |
|         | $S_0 \rightarrow S_{P\Sigma}(^1\pi\sigma^*)$ | 75.6  | 75.5         | 75.5     | $\pi$                    | $\sigma^*$ |
|         | $S_0 \rightarrow S_{N\Sigma}(^1n\sigma^*)$   | 163.4 | 163.5        | 163.5    | n                        | $\sigma^*$ |

## Section 5. Tables

**Table S5-1** The absolute energies (A.E.) in Hartree and relative energies (R.E.) in kcal/mol for the optimized structures of **1** along the reaction pathway leading to oxenium ion at the CAS(8,7)/6-31G\*\*/CASPT2 level of theory. The corresponding energy profiles are plotted in Figure 1 of the main article.

| 1                                             | CASSCF    | RASSCF    | CASPT2    |          |
|-----------------------------------------------|-----------|-----------|-----------|----------|
|                                               | A.E.      | A.E.      | A.E.      | R.E.     |
| <b>S<sub>0</sub></b>                          |           |           |           |          |
| Root1                                         | -360.9570 | -360.9450 | -362.0198 | 0        |
| Root2( $S_{PP}(^1\pi\pi^*)$ )                 |           | -360.7083 | -361.8425 | 111.2687 |
| Root3( $S_{N\Sigma}(^1n\sigma^*)$ )           |           | -360.6596 | -361.7623 | 161.5757 |
| Root4( $S_{CT}(^1\pi\sigma^*)$ )              |           | -360.6464 | -361.8170 | 127.2372 |
| Root5                                         |           | -360.6061 | -361.7880 | 145.4835 |
| <b>Path-<math>S_{PP}(^1\pi\pi^*)</math>-4</b> |           |           |           |          |
| Root1                                         |           | -360.9378 | -362.0132 | 4.1715   |
| Root2                                         | -360.7399 | -360.7227 | -361.8478 | 107.9447 |
| Root3                                         |           | -360.6568 | -361.7630 | 161.1181 |
| Root4                                         |           | -360.6515 | -361.8176 | 126.8931 |
| Root5                                         |           | -360.6042 | -361.7857 | 146.9208 |
| <b>Path-<math>S_{PP}(^1\pi\pi^*)</math>-7</b> |           |           |           |          |
| Root1                                         |           | -360.9285 | -362.0048 | 9.4429   |
| Root2                                         | -360.7425 | -360.7268 | -361.8450 | 109.7161 |
| Root3                                         |           | -360.6468 | -361.7745 | 153.9611 |
| Root4                                         |           | -360.6420 | -361.8081 | 132.8583 |



|                                      |           |           |           |          |
|--------------------------------------|-----------|-----------|-----------|----------|
| Root5                                |           | -360.5987 | -361.7818 | 149.3506 |
| <b>Path-S<sub>PP</sub>(1ππ*)-Min</b> |           |           |           |          |
| Root1                                |           | -360.9282 | -362.0046 | 9.5527   |
| Root2                                | -360.7427 | -360.7273 | -361.8448 | 109.7986 |
| Root3                                |           | -360.6489 | -361.7862 | 146.5720 |
| Root4                                |           | -360.6413 | -361.8065 | 133.8275 |
| Root5                                |           | -360.5985 | -361.7989 | 138.6260 |
| <b>CI(1ππ*/1πσ*)</b>                 |           |           |           |          |
| Root1                                |           | -360.9141 | -362.0040 | 9.9186   |
| Root2                                | -360.7406 | -360.7319 | -361.8640 | 97.7841  |
| Root3                                |           | -360.7251 | -361.8587 | 101.1042 |
| Root4                                |           | -360.6993 | -361.8442 | 110.2164 |
| Root5                                |           | -360.6555 | -361.8200 | 125.3554 |
| <b>Path-S<sub>CT</sub>(1πσ*)-16</b>  |           |           |           |          |
| Root1                                |           | -360.9153 | -362.0014 | 11.5333  |
| Root2                                | -360.7744 | -360.7603 | -361.8814 | 86.8242  |
| Root3                                |           | -360.7523 | -361.8809 | 87.1410  |
| Root4(S <sub>NΣ</sub> (1πσ*))        |           | -360.7280 | -361.8642 | 97.6545  |
| Root5                                |           | -360.6605 | -361.8213 | 124.5493 |
| <b>CI(1πσ*/1πσ*)</b>                 |           |           |           |          |
| Root1                                |           | -360.9094 | -361.9984 | 13.4372  |
| Root2                                | -360.8104 | -360.7814 | -361.8873 | 83.1353  |
| Root3                                |           | -360.7649 | -361.8921 | 80.1297  |
| Root4(S <sub>NΣ</sub> (1πσ*))        |           | -360.7520 | -361.8854 | 84.3203  |
| Root5                                |           | -360.6780 | -361.8161 | 127.8229 |
| <b>Path-S<sub>CT</sub>(1πσ*)-21</b>  |           |           |           |          |
| Root1                                |           | -360.9153 | -362.0083 | 7.2429   |
| Root2                                | -360.8044 | -360.8208 | -361.9223 | 61.1822  |
| Root3                                |           | -360.7959 | -361.9132 | 66.9101  |
| Root4                                |           | -360.7753 | -361.8966 | 77.2873  |
| Root5                                |           | -360.7517 | -361.8701 | 93.9530  |
| <b>STC(1πσ*/3ππ*/3ηπ*)</b>           |           |           |           |          |
| Root1                                |           | -360.9085 | -362.0011 | 11.7435  |
| Root2                                | -360.8423 | -360.8364 | -361.9458 | 46.4179  |
| Root3                                |           | -360.8220 | -361.9358 | 52.7227  |
| Root4                                |           | -360.8123 | -361.9289 | 57.0061  |
| Root5                                |           | -360.8019 | -361.9060 | 71.3913  |
| <b>CI(1πσ*/S<sub>0</sub>)</b>        |           |           |           |          |
| Root1                                | -360.9439 | -360.9066 | -361.9708 | 30.7572  |
| Root2(S <sub>CT</sub> (1πσ*))        |           | -360.8464 | -361.9631 | 35.5600  |
| Root3                                |           | -360.8369 | -361.9445 | 47.2698  |
| Root4                                |           | -360.7878 | -361.8758 | 90.3509  |
| Root5                                |           | -360.7849 | -361.8688 | 94.7790  |

|                              |           |           |           |         |
|------------------------------|-----------|-----------|-----------|---------|
| <b>Path-S<sub>0</sub>-33</b> |           |           |           |         |
| Root1                        | -360.9614 | -360.9248 | -361.9896 | 18.9753 |
| Root2                        |           | -360.8599 | -361.9451 | 46.8403 |
| Root3                        |           | -360.8245 | -361.9481 | 45.0020 |
| Root4                        |           | -360.8036 | -361.8925 | 79.9105 |
| Root5                        |           | -360.8005 | -361.8851 | 84.5105 |
| <b>Oxenium Ion</b>           |           |           |           |         |
| Root1                        | -360.9740 | -360.9387 | -362.0052 | 9.1608  |
| Root2                        |           | -360.8696 | -361.9564 | 39.8193 |
| Root3                        |           | -360.8215 | -361.9266 | 58.4570 |
| Root4                        |           | -360.8126 | -361.8996 | 75.4402 |
| Root5                        |           | -360.7825 | -361.9156 | 65.4103 |

**Table S5-2** The absolute energies (A. E.) in Hartree and relative energies (R.E.) in kcal/mol for the optimized structures of **2** along the reaction pathway leading to oxenium ion at the CAS(12,11)/6-31G\*\*/CASPT2 level of theory. The corresponding energy profiles are plotted in Figure 2a of the main article.

| <b>2</b>                                              | <b>CASSCF</b> | <b>RASSCF</b> | <b>CASPT2</b> |             |
|-------------------------------------------------------|---------------|---------------|---------------|-------------|
|                                                       | <b>A.E.</b>   | <b>A.E.</b>   | <b>A.E.</b>   | <b>R.E.</b> |
| <b>S<sub>0</sub></b>                                  |               |               |               |             |
| Root1                                                 | -590.5582     | -590.5467     | -592.3596     | 0           |
| Root2                                                 |               | -590.3300     | -592.1976     | 101.6506    |
| Root3(S <sub>PP</sub> ( <sup>1</sup> ππ*))            |               | -590.3250     | -592.1897     | 106.6020    |
| Root4(S <sub>CT</sub> ( <sup>1</sup> πσ*))            |               | -590.3099     | -592.1896     | 106.7167    |
| Root5                                                 |               | -590.2608     | -592.1538     | 129.1595    |
| Root6                                                 |               | -590.2581     | -592.1532     | 129.5505    |
| Root7                                                 |               | -590.2539     | -592.1742     | 116.3744    |
| Root8(S <sub>N<sub>2</sub></sub> ( <sup>1</sup> nσ*)) |               | -590.2497     | -592.1028     | 161.1740    |
| <b>Path-S<sub>CT</sub>(<sup>1</sup>πσ*)-4</b>         |               |               |               |             |
| Root1                                                 |               | -590.5233     | -592.3475     | 7.6051      |
| Root2                                                 | -590.3546     | -590.3346     | -592.2249     | 84.5573     |
| Root3                                                 |               | -590.3118     | -592.1929     | 104.6009    |
| Root4                                                 |               | -590.3076     | -592.2055     | 96.7248     |
| Root5                                                 |               | -590.2984     | -592.1484     | 132.5526    |
| Root6                                                 |               | -590.2754     | -592.1829     | 110.8503    |
| Root7                                                 |               | -590.2605     | -592.1699     | 119.0128    |
| Root8                                                 |               | -590.2519     | -592.1857     | 109.1201    |
| <b>Path-S<sub>CT</sub>(<sup>1</sup>πσ*)-8</b>         |               |               |               |             |
| Root1                                                 |               | -590.5118     | -592.3511     | 5.3153      |
| Root2                                                 | -590.3977     | -590.3916     | -592.2689     | 56.8982     |
| Root3                                                 |               | -590.3622     | -592.2192     | 88.1219     |
| Root4                                                 |               | -590.3499     | -592.2338     | 78.9464     |
| Root5                                                 |               | -590.3439     | -592.2278     | 82.7087     |

|                                                  |           |           |            |          |
|--------------------------------------------------|-----------|-----------|------------|----------|
| Root6                                            |           | -590.3341 | -592.2289  | 81.9882  |
| Root7                                            |           | -590.3007 | -592.2066  | 96.0253  |
| Root8                                            |           | -590.2809 | -592.1859  | 108.9876 |
| <b>Path-S<sub>CT</sub>(1πσ*)-11</b>              |           |           |            |          |
| Root1                                            |           | -590.5097 | -592.3569  | 1.6482   |
| Root2                                            | -590.4249 | -590.4211 | -592.2852  | 46.6753  |
| Root3                                            |           | -590.3909 | -592.2489  | 69.5026  |
| Root4                                            |           | -590.3801 | -592.2520  | 67.4854  |
| Root5                                            |           | -590.3758 | -592.2467  | 70.8300  |
| Root6                                            |           | -590.3688 | -592.2491  | 69.3443  |
| Root7                                            |           | -590.3424 | -592.2094  | 94.2679  |
| Root8                                            |           | -590.3247 | -592.2278  | 82.7259  |
| <b>Path-S<sub>CT</sub>(1πσ*)-14</b>              |           |           |            |          |
| Root1                                            |           | -590.5113 | -592.3523  | 4.5669   |
| Root2                                            | -590.4448 | -590.4377 | -592.2947  | 40.7280  |
| Root3                                            |           | -590.4307 | -592.2712  | 55.4747  |
| Root4                                            |           | -590.4092 | -592.2691  | 56.8096  |
| Root5                                            |           | -590.4043 | -592.2676  | 57.7639  |
| Root6                                            |           | -590.4022 | -592.2647  | 59.5724  |
| Root7                                            |           | -590.3947 | -592.2569  | 64.4372  |
| Root8                                            |           | -590.3638 | -592.21505 | 90.7203  |
| <b>STC(1πσ*/<sup>3</sup>ππ*/<sup>3</sup>ηπ*)</b> |           |           |            |          |
| Root1                                            |           | -590.5221 | -592.3516  | 5.0091   |
| Root2(S <sub>CT</sub> (1πσ*))                    | -590.4612 | -590.4445 | -592.3029  | 35.5923  |
| Root3(S <sub>NΣ</sub> (1πσ*))                    |           | -590.4422 | -592.3029  | 35.5394  |
| Root4                                            |           | -590.4129 | -592.2711  | 55.5261  |
| Root5                                            |           | -590.4064 | -592.2591  | 63.0700  |
| Root6                                            |           | -590.3912 | -592.2575  | 64.1136  |
| Root7                                            |           | -590.3829 | -592.2578  | 63.9204  |
| Root8                                            |           | -590.3719 | -592.2293  | 81.7582  |
| <b>CI(1πσ*/S<sub>0</sub>)</b>                    |           |           |            |          |
| Root1                                            |           | -590.5221 | -592.3298  | 18.7293  |
| Root2(S <sub>CT</sub> (1πσ*))                    | -590.4919 | -590.4445 | -592.3265  | 20.8126  |
| Root3                                            |           | -590.4422 | -592.2779  | 51.2921  |
| Root4                                            |           | -590.4129 | -592.2540  | 66.2659  |
| Root5                                            |           | -590.4064 | -592.2492  | 69.2912  |
| Root6                                            |           | -590.3912 | -592.2589  | 63.1553  |
| Root7                                            |           | -590.3829 | -592.2157  | 90.2969  |
| Root8                                            |           | -590.3719 | -592.2234  | 85.4599  |
| <b>Path-S<sub>0</sub>-22</b>                     |           |           |            |          |
| Root1                                            | -590.5510 | -590.5333 | -592.3451  | 9.1116   |
| Root2                                            |           | -590.4555 | -592.2869  | 45.5758  |
| Root3                                            |           | -590.4369 | -592.3243  | 22.1481  |
| Root4                                            |           | -590.4305 | -592.2622  | 61.0862  |
| Root5                                            |           | -590.4184 | -592.2583  | 63.5539  |

|                              |           |           |           |          |
|------------------------------|-----------|-----------|-----------|----------|
| Root6                        |           | -590.3851 | -592.2206 | 87.2257  |
| Root7                        |           | -590.3829 | -592.2302 | 81.2231  |
| Root8                        |           | -590.3766 | -592.2367 | 77.1277  |
| <b>Path-S<sub>0</sub>-25</b> |           |           |           |          |
| Root1                        | -590.5745 | -590.5698 | -592.3676 | -5.01130 |
| Root2                        |           | -590.4947 | -592.3071 | 32.9460  |
| Root3                        |           | -590.4746 | -592.2884 | 44.6919  |
| Root4                        |           | -590.4449 | -592.2732 | 54.2616  |
| Root5                        |           | -590.4315 | -592.2455 | 71.6378  |
| Root6                        |           | -590.4176 | -592.2481 | 69.9941  |
| Root7                        |           | -590.4119 | -592.2589 | 63.1448  |
| Root8                        |           | -590.3900 | -592.2194 | 88.0034  |
| <b>Oxenium Ion</b>           |           |           |           |          |
| Root1                        | -590.5832 | -590.5829 | -592.3743 | -9.2308  |
| Root2                        |           | -590.5033 | -592.3129 | 29.2839  |
| Root3                        |           | -590.4797 | -592.2877 | 45.1484  |
| Root4                        |           | -590.4393 | -592.2658 | 58.8550  |
| Root5                        |           | -590.4349 | -592.2473 | 70.4922  |
| Root6                        |           | -590.4196 | -592.2472 | 70.5511  |
| Root7                        |           | -590.4157 | -592.2712 | 55.5105  |
| Root8                        |           | -590.3914 | -592.2567 | 64.5686  |

**Table S5-3** The absolute energies (A. E.) in Hartree and relative energies (R.E.) in kcal/mol for the optimized structures of **3** along the reaction pathway leading to oxenium ion at the CAS(10,8)/6-31G\*\*/CASPT2 level of theory. The corresponding energy profiles are plotted in Figure 2b of the main article.

| <b>3</b>                                      | <b>CASSCF</b> | <b>RASSCF</b> | <b>CASPT2</b> |             |
|-----------------------------------------------|---------------|---------------|---------------|-------------|
|                                               | <b>A.E.</b>   | <b>A.E.</b>   | <b>A.E.</b>   | <b>R.E.</b> |
| <b>S<sub>0</sub></b>                          |               |               |               |             |
| Root1                                         | -494.0494     | -494.0422     | -495.5764     | 0           |
| Root2(S <sub>CT</sub> ( <sup>1</sup> πσ*))    |               | -493.8456     | -495.4403     | 85.3932     |
| Root3(S <sub>PP</sub> ( <sup>1</sup> ππ*))    |               | -493.8044     | -495.4043     | 108.0050    |
| Root4                                         |               | -493.7589     | -495.3743     | 126.8480    |
| Root5(S <sub>NΣ</sub> ( <sup>1</sup> nσ*))    |               | -493.7547     | -495.3217     | 159.8430    |
| <b>Path-S<sub>CT</sub>(<sup>1</sup>πσ*)-4</b> |               |               |               |             |
| Root1                                         |               | -494.0404     | -495.5751     | 0.8511      |
| Root2(S <sub>CT</sub> ( <sup>1</sup> πσ*))    | -493.8618     | -493.8547     | -495.4464     | 81.5867     |
| Root3                                         |               | -493.8106     | -495.4088     | 105.1586    |
| Root4                                         |               | -493.7689     | -495.3787     | 124.0853    |
| Root5                                         |               | -493.7604     | -495.3275     | 156.2053    |
| <b>Path-S<sub>CT</sub>(<sup>1</sup>πσ*)-7</b> |               |               |               |             |
| Root1                                         |               | -494.0255     | -495.5715     | 3.08738     |
| Root2                                         | -493.8735     | -493.8722     | -495.4728     | 65.0094     |

|                                     |           |           |           |          |
|-------------------------------------|-----------|-----------|-----------|----------|
| Root3                               |           | -493.8317 | -495.4269 | 93.8083  |
| Root4                               |           | -493.7999 | -495.3786 | 124.1577 |
| Root5                               |           | -493.7932 | -495.4159 | 100.7171 |
| <b>Path-S<sub>CT</sub>(1πσ*)-10</b> |           |           |           |          |
| Root1                               |           | -494.0107 | -495.5672 | 5.7838   |
| Root2                               | -493.9329 | -493.9298 | -495.5077 | 43.1405  |
| Root3                               |           | -493.8752 | -495.4546 | 76.4720  |
| Root4                               |           | -493.8525 | -495.4264 | 94.1586  |
| Root5                               |           | -493.8260 | -495.4172 | 99.9120  |
| <b>Path-S<sub>CT</sub>(1πσ*)-13</b> |           |           |           |          |
| Root1                               |           | -590.5113 | -495.5662 | 6.3973   |
| Root2                               | -493.9693 | -590.4377 | -495.5304 | 28.8738  |
| Root3                               |           | -590.4307 | -495.4712 | 66.0552  |
| Root4                               |           | -590.4092 | -495.4579 | 74.3938  |
| Root5                               |           | -590.4043 | -495.4368 | 87.6314  |
| <b>Path-S<sub>CT</sub>(1πσ*)-16</b> |           |           |           |          |
| Root1                               |           | -493.9996 | -495.5504 | 16.2990  |
| Root2                               | -493.9922 | -493.9872 | -495.5285 | 30.0813  |
| Root3                               |           | -493.9328 | -495.4617 | 71.9653  |
| Root4                               |           | -493.9002 | -495.4754 | 63.3982  |
| Root5                               |           | -493.8922 | -495.4463 | 81.6266  |
| <b>Path-S<sub>CT</sub>(1πσ*)-18</b> |           |           |           |          |
| Root1                               |           | -494.0048 | -495.5399 | 22.8633  |
| Root2                               | -494.0050 | -494.0021 | -495.5305 | 28.8305  |
| Root3                               |           | -493.9693 | -495.4892 | 54.7512  |
| Root4                               |           | -493.9222 | -495.4580 | 74.2802  |
| Root5                               |           | -493.9062 | -495.4496 | 79.5608  |
| <b>CI(1πσ*/S<sub>0</sub>)</b>       |           |           |           |          |
| Root1(S <sub>0</sub> )              | -494.0100 | -494.0093 | -495.5366 | 24.9628  |
| Root2(S <sub>CT</sub> (1πσ*))       |           | -494.0074 | -495.5339 | 26.6710  |
| Root3                               |           | -493.9863 | -495.5061 | 44.1156  |
| Root4                               |           | -493.9359 | -495.4676 | 68.3011  |
| Root5                               |           | -493.9141 | -495.4534 | 77.1643  |
| <b>Path-S<sub>0</sub>-23</b>        |           |           |           |          |
| Root1                               | -494.0547 | -494.0467 | -495.5614 | 9.4371   |
| Root2                               |           | -494.0022 | -495.5257 | 31.8036  |
| Root3                               |           | -493.9787 | -495.5211 | 34.7111  |
| Root4                               |           | -493.9455 | -495.4810 | 59.86968 |
| Root5                               |           | -493.9191 | -495.4525 | 77.77422 |
| <b>Path-S<sub>0</sub>-25</b>        |           |           |           |          |
| Root1                               | -494.0677 | -494.0592 | -495.5680 | 5.25346  |
| Root2                               |           | -494.0029 | -495.5302 | 29.0007  |
| Root3                               |           | -493.9803 | -495.5298 | 29.2501  |

|                    |           |           |           |         |
|--------------------|-----------|-----------|-----------|---------|
| Root4              |           | -493.9569 | -495.4934 | 52.1153 |
| Root5              |           | -493.9347 | -495.4641 | 70.4715 |
| <b>Oxenium Ion</b> |           |           |           |         |
| Root1              | -494.0785 | -494.0703 | -495.5784 | -1.2273 |
| Root2              |           | -494.0042 | -495.5333 | 27.0853 |
| Root3              |           | -493.9851 | -495.5368 | 24.8626 |
| Root4              |           | -493.9693 | -495.5057 | 44.4047 |
| Root5              |           | -493.9465 | -495.4782 | 61.6409 |

**Table S5-4** The absolute energies (A. E.) in Hartree and relative energies (R.E.) in kcal/mol for the optimized structures of **1** along the reaction pathway leading to HBD at the CAS(8,7)/6-31G\*\*/CASPT2 level of theory. The corresponding energy profiles are plotted in Figure 3 of the main article.

| <b>1 Lead to HBD</b>                            | <b>CASSCF</b> | <b>RASSCF</b> | <b>CASPT2</b> |             |
|-------------------------------------------------|---------------|---------------|---------------|-------------|
|                                                 | <b>A.E.</b>   | <b>A.E.</b>   | <b>A.E.</b>   | <b>R.E.</b> |
| <b>S<sub>0</sub></b>                            |               |               |               |             |
| Root1                                           | -360.9570     | -360.9450     | -362.0198     | 0           |
| Root2(S <sub>PP</sub> ( <sup>1</sup> ππ*))      |               | -360.7083     | -361.8425     | 111.2687    |
| Root3(S <sub>NΣ</sub> ( <sup>1</sup> nσ*))      |               | -360.6596     | -361.7623     | 161.5757    |
| Root4(S <sub>CT</sub> ( <sup>1</sup> πσ*))      |               | -360.6464     | -361.8170     | 127.2372    |
| Root5                                           |               | -360.6061     | -361.7880     | 145.4835    |
| <b>Path-S<sub>PP</sub>(<sup>1</sup>ππ*)-4</b>   |               |               |               |             |
| Root1                                           |               | -360.9378     | -362.0132     | 4.1715      |
| Root2                                           | -360.7399     | -360.7227     | -361.8478     | 107.9447    |
| Root3                                           |               | -360.6568     | -361.7630     | 161.1181    |
| Root4                                           |               | -360.6515     | -361.8176     | 126.8931    |
| Root5                                           |               | -360.6042     | -361.7857     | 146.9208    |
| <b>Path-S<sub>PP</sub>(<sup>1</sup>ππ*)-7</b>   |               |               |               |             |
| Root1                                           |               | -360.9285     | -362.0048     | 9.4429      |
| Root2                                           | -360.7425     | -360.7268     | -361.8450     | 109.7161    |
| Root3                                           |               | -360.6468     | -361.7745     | 153.9611    |
| Root4                                           |               | -360.6420     | -361.8081     | 132.8583    |
| Root5                                           |               | -360.5987     | -361.7818     | 149.3506    |
| <b>Path-S<sub>PP</sub>(<sup>1</sup>ππ*)-Min</b> |               |               |               |             |
| Root1                                           |               | -360.9282     | -362.0046     | 9.5527      |
| Root2                                           | -360.7427     | -360.7273     | -361.8448     | 109.7986    |
| Root3                                           |               | -360.6489     | -361.7862     | 146.5720    |
| Root4                                           |               | -360.6413     | -361.8065     | 133.8275    |
| Root5                                           |               | -360.5985     | -361.7989     | 138.6260    |
| <b>CI(<sup>1</sup>ππ*/<sup>1</sup>πσ*)</b>      |               |               |               |             |
| Root1                                           |               | -360.9141     | -362.0040     | 9.9186      |
| Root2                                           | -360.7406     | -360.7319     | -361.8640     | 97.7841     |

|                                     |            |           |           |          |
|-------------------------------------|------------|-----------|-----------|----------|
| Root3                               |            | -360.7251 | -361.8587 | 101.1042 |
| Root4                               |            | -360.6993 | -361.8442 | 110.2164 |
| Root5                               |            | -360.6555 | -361.8200 | 125.3554 |
| <b>Path-S<sub>CT</sub>(1πσ*)-16</b> |            |           |           |          |
| Root1                               |            | -360.9153 | -362.0014 | 11.5333  |
| Root2                               | --360.7744 | -360.7603 | -361.8814 | 86.8242  |
| Root3                               |            | -360.7523 | -361.8809 | 87.1410  |
| Root4(S <sub>NΣ</sub> (1πσ*))       |            | -360.7280 | -361.8642 | 97.6545  |
| Root5                               |            | -360.6605 | -361.8213 | 124.5493 |
| <b>CI(1πσ*/1πσ*)</b>                |            |           |           |          |
| Root1                               |            | -360.9094 | -361.9984 | 13.4372  |
| Root2(S <sub>CT</sub> (1πσ*))       | -360.8104  | -360.7814 | -361.8873 | 83.1353  |
| Root3                               |            | -360.7649 | -361.8921 | 80.1297  |
| Root4(S <sub>NΣ</sub> (1πσ*))       |            | -360.7520 | -361.8854 | 84.3203  |
| Root5                               |            | -360.6780 | -361.8161 | 127.8229 |
| <b>Path-S<sub>NΣ</sub>(1πσ*)-21</b> |            |           |           |          |
| Root1                               |            | -360.9127 | -362.0056 | 8.9342   |
| Root2                               |            | -360.8122 | -361.9122 | 67.4960  |
| Root3                               |            | -360.7857 | -361.9072 | 70.6711  |
| Root4                               | -360.8291  | -360.7769 | -361.9006 | 74.8330  |
| Root5                               |            | -360.7201 | -361.8436 | 110.5545 |
| <b>Path-S<sub>NΣ</sub>(1πσ*)-24</b> |            |           |           |          |
| Root1                               |            | -360.9055 | -362.0017 | 11.3917  |
| Root2                               |            | -360.8271 | -361.9243 | 59.9476  |
| Root3                               | -360.8532  | -360.7977 | -361.9116 | 67.9224  |
| Root4                               |            | -360.7893 | -361.9046 | 72.2865  |
| Root5                               |            | -360.7573 | -361.8663 | 96.2912  |
| <b>Path-S<sub>NΣ</sub>(1πσ*)-27</b> |            |           |           |          |
| Root1                               |            | -360.8951 | -361.9930 | 16.8065  |
| Root2                               |            | -360.8345 | -361.9303 | 56.1634  |
| Root3                               | -360.8681  | -360.8144 | -361.9156 | 65.4138  |
| Root4                               |            | -360.7988 | -361.9101 | 68.8477  |
| Root5                               |            | -360.7907 | -361.8931 | 79.5002  |
| <b>Path-S<sub>NΣ</sub>(1πσ*)-30</b> |            |           |           |          |
| Root1                               |            | -360.8881 | -361.9853 | 21.6493  |
| Root2                               |            | -360.8380 | -361.9358 | 52.6950  |
| Root3                               | -360.8753  | -360.8303 | -361.9286 | 57.2058  |
| Root4                               |            | -360.8126 | -361.9086 | 69.8080  |
| Root5                               |            | -360.8032 | -361.9038 | 72.7682  |
| <b>CI(1πσ*/<sup>3</sup>σσ*)</b>     |            |           |           |          |
| Root1                               |            | -360.8840 | -361.9794 | 25.3417  |
| Root2                               | -360.8772  | -360.8407 | -361.9448 | 47.0804  |
| Root3                               |            | -360.8364 | -361.9361 | 52.5007  |

|                                                                       |           |           |           |          |
|-----------------------------------------------------------------------|-----------|-----------|-----------|----------|
| Root4                                                                 |           | -360.8217 | -361.9151 | 65.6823  |
| Root5                                                                 |           | -360.8053 | -361.8985 | 76.1233  |
| <b>Path-T<sub>ΣΣ</sub>(<sup>3</sup>σσ*)-37</b>                        |           |           |           |          |
| Root1                                                                 | -360.9186 | -360.8984 | -361.9764 | 27.2381  |
| Root2                                                                 |           | -360.8394 | -361.9244 | 59.8742  |
| Root3                                                                 |           | -360.7950 | -361.8890 | 82.1297  |
| Root4                                                                 |           | -360.7803 | -361.8872 | 83.2376  |
| Root5                                                                 |           | -360.7547 | -361.8536 | 104.2738 |
| <b>CI(<sup>3</sup>σσ*/S<sub>0</sub>(-NH<sub>3</sub><sup>+</sup>))</b> |           |           |           |          |
| Root1                                                                 | -360.9272 | -360.9057 | -361.9832 | 22.9225  |
| Root2                                                                 |           | -360.8218 | -361.9180 | 63.9045  |
| Root3                                                                 |           | -360.8088 | -361.9080 | 70.1256  |
| Root4                                                                 |           | -360.7711 | -361.8718 | 92.8633  |
| Root5                                                                 |           | -360.7643 | -361.8686 | 94.9036  |
| <b>Path-S<sub>0</sub>-43</b>                                          |           |           |           |          |
| Root1                                                                 | -360.9309 | -360.9099 | -361.9876 | 20.2017  |
| Root2                                                                 |           | -360.8636 | -361.9515 | 42.8705  |
| Root3                                                                 |           | -360.8170 | -361.9093 | 69.3735  |
| Root4                                                                 |           | -360.7753 | -361.8806 | 87.3831  |
| Root5                                                                 |           | -360.7692 | -361.8762 | 90.1401  |
| <b>HBD( Radical)</b>                                                  |           |           |           |          |
| Root1                                                                 | -360.9363 | -360.9156 | -361.9929 | 16.8809  |
| Root2                                                                 |           | -360.8579 | -361.9455 | 46.6498  |
| Root3                                                                 |           | -360.8219 | -361.9137 | 66.5570  |
| Root4                                                                 |           | -360.7760 | -361.8755 | 90.5228  |
| Root5                                                                 |           | -360.7689 | -361.8725 | 92.4498  |

**Table S5-5** The absolute energies (A. E.) in Hartree and relative energies (R.E.) in kcal/mol for the optimized structures of **2** along the reaction pathway leading to HBD at the CAS(12,11)/6-31G\*\*/CASPT2 level of theory. The corresponding energy profiles are plotted in Figure S-3.2 of the SI.

| 2 Lead to HBD                              | CASSCF    | RASSCF    | CASPT2    |          |
|--------------------------------------------|-----------|-----------|-----------|----------|
|                                            | A.E.      | A.E.      | A.E.      | R.E.     |
| <b>S<sub>0</sub></b>                       |           |           |           |          |
| Root1                                      | -590.5582 | -590.5467 | -592.3596 | 0        |
| Root2                                      |           | -590.3300 | -592.1976 | 101.6506 |
| Root3(S <sub>PP</sub> ( <sup>1</sup> ππ*)) |           | -590.3250 | -592.1897 | 106.6020 |
| Root4(S <sub>CT</sub> ( <sup>1</sup> πσ*)) |           | -590.3099 | -592.1896 | 106.7167 |
| Root5                                      |           | -590.2608 | -592.1538 | 129.1595 |
| Root6                                      |           | -590.2581 | -592.1532 | 129.5505 |
| Root7                                      |           | -590.2539 | -592.1742 | 116.3744 |
| Root8(S <sub>NΣ</sub> ( <sup>1</sup> nσ*)) |           | -590.2497 | -592.1028 | 161.1740 |





|                                          |           |           |            |          |
|------------------------------------------|-----------|-----------|------------|----------|
| <b>Path-S<sub>CT</sub>(1πσ*)-4</b>       |           |           |            |          |
| Root1                                    |           | -590.5233 | -592.3475  | 7.6051   |
| Root2                                    | -590.3546 | -590.3346 | -592.2249  | 84.5573  |
| Root3                                    |           | -590.3118 | -592.1929  | 104.6009 |
| Root4                                    |           | -590.3076 | -592.2055  | 96.7248  |
| Root5                                    |           | -590.2984 | -592.1484  | 132.5526 |
| Root6                                    |           | -590.2754 | -592.1829  | 110.8503 |
| Root7                                    |           | -590.2605 | -592.1699  | 119.0128 |
| Root8                                    |           | -590.2519 | -592.1857  | 109.1201 |
| <b>Path-S<sub>CT</sub>(1πσ*)-8</b>       |           |           |            |          |
| Root1                                    |           | -590.5118 | -592.3511  | 5.3153   |
| Root2                                    | -590.3977 | -590.3916 | -592.2689  | 56.8982  |
| Root3                                    |           | -590.3622 | -592.2192  | 88.1219  |
| Root4                                    |           | -590.3499 | -592.2338  | 78.9464  |
| Root5                                    |           | -590.3439 | -592.2278  | 82.7087  |
| Root6                                    |           | -590.3341 | -592.2289  | 81.9882  |
| Root7                                    |           | -590.3007 | -592.2066  | 96.0253  |
| Root8                                    |           | -590.2809 | -592.1859  | 108.9876 |
| <b>Path-S<sub>CT</sub>(1πσ*)-11</b>      |           |           |            |          |
| Root1                                    |           | -590.5097 | -592.3569  | 1.6482   |
| Root2                                    | -590.4249 | -590.4211 | -592.2852  | 46.6753  |
| Root3                                    |           | -590.3909 | -592.2489  | 69.5026  |
| Root4                                    |           | -590.3801 | -592.2520  | 67.4854  |
| Root5                                    |           | -590.3758 | -592.2467  | 70.8300  |
| Root6                                    |           | -590.3688 | -592.2491  | 69.3443  |
| Root7                                    |           | -590.3424 | -592.2094  | 94.2679  |
| Root8                                    |           | -590.3247 | -592.2278  | 82.7259  |
| <b>Path-S<sub>CT</sub>(1πσ*)-14</b>      |           |           |            |          |
| Root1                                    |           | -590.5113 | -592.3523  | 4.5669   |
| Root2                                    | -590.4448 | -590.4377 | -592.2947  | 40.7280  |
| Root3                                    |           | -590.4307 | -592.2712  | 55.4747  |
| Root4                                    |           | -590.4092 | -592.2691  | 56.8096  |
| Root5                                    |           | -590.4043 | -592.2676  | 57.7639  |
| Root6                                    |           | -590.4022 | -592.2647  | 59.5724  |
| Root7                                    |           | -590.3947 | -592.2569  | 64.4372  |
| Root8                                    |           | -590.3638 | -592.21505 | 90.7203  |
| <b>CI(1πσ*/1πσ*)</b>                     |           |           |            |          |
| Root1                                    |           | -590.5221 | -592.3516  | 5.0091   |
| Root2(S <sub>CT</sub> (1πσ*))            | -590.4612 | -590.4445 | -592.3029  | 35.5923  |
| Root3(S <sub>N<sub>2</sub></sub> (1πσ*)) |           | -590.4422 | -592.3029  | 35.5394  |
| Root4                                    |           | -590.4129 | -592.3039  | 34.9811  |
| Root5                                    |           | -590.4064 | -592.2591  | 63.0700  |
| Root6                                    |           | -590.3912 | -592.2575  | 64.1136  |
| Root7                                    |           | -590.3829 | -592.2578  | 63.9204  |
| Root8                                    |           | -590.3719 | -592.2293  | 81.7582  |

|                                                               |           |           |           |          |
|---------------------------------------------------------------|-----------|-----------|-----------|----------|
| <b>STC(<math>1n\sigma^*/3\sigma\sigma^*</math>)</b>           |           |           |           |          |
| Root3( $S_{N_2}(1n\sigma^*)$ )                                |           | -590.4799 | -592.3034 | 35.2981  |
| Root2                                                         |           | -590.4764 | -592.2873 | 45.4037  |
| Root3( $S_{N_2}(3\sigma\sigma^*)$ )                           | -590.5222 | -590.4531 | -592.3070 | 33.0142  |
| Root4                                                         |           | -590.4486 | -592.2750 | 53.0806  |
| Root5                                                         |           | -590.3995 | -592.2315 | 80.3672  |
| Root6                                                         |           | -590.3737 | -592.2113 | 93.0497  |
| Root7                                                         |           | -590.3713 | -592.1971 | 102.0105 |
| Root8                                                         |           | -590.3689 | -592.1922 | 105.0378 |
| <b>Path-<math>T_{\Sigma\Sigma}(3\sigma\sigma^*)</math>-20</b> |           |           |           |          |
| Root1                                                         |           | -590.4808 | -592.3132 | 29.1238  |
| Root2                                                         |           | -590.4764 | -592.2834 | 47.8286  |
| Root3 ( $T_{\Sigma\Sigma}(3\sigma\sigma^*)$ )                 | -590.5290 | -590.4561 | -592.3107 | 30.6856  |
| Root4                                                         |           | -590.4494 | -592.2709 | 55.6625  |
| Root5                                                         |           | -590.3994 | -592.2322 | 79.9640  |
| Root6                                                         |           | -590.3757 | -592.2253 | 84.3132  |
| Root7                                                         |           | -590.3717 | -592.1907 | 105.9891 |
| Root8                                                         |           | -590.3695 | -592.1936 | 104.1777 |
| <b>Path-<math>T_{\Sigma\Sigma}(3\sigma\sigma^*)</math>-22</b> |           |           |           |          |
| Root1( $T_{\Sigma\Sigma}(3\sigma\sigma^*)$ )                  | -590.5350 | -590.5045 | -592.3356 | 15.0709  |
| Root2                                                         |           | -590.4475 | -592.2764 | 52.2118  |
| Root3                                                         |           | -590.4431 | -592.2773 | 51.6483  |
| Root4                                                         |           | -590.4245 | -592.2684 | 57.2320  |
| Root5                                                         |           | -590.4051 | -592.2510 | 68.1543  |
| Root6                                                         |           | -590.3888 | -592.2596 | 62.7741  |
| Root7                                                         |           | -590.3734 | -592.2363 | 77.3761  |
| Root8                                                         |           | -590.3715 | -592.2421 | 73.7512  |
| <b>STC(<math>3\sigma\sigma^*/S_0(\cdot NH_3^+)</math>)</b>    |           |           |           |          |
| Root1( $T_{\Sigma\Sigma}(3\sigma\sigma^*)$ )                  | -590.5287 | -590.5072 | -592.3449 | 9.1958   |
| Root2                                                         |           | -590.5003 | -592.3283 | 19.6795  |
| Root3                                                         |           | -590.4061 | -592.2569 | 64.4775  |
| Root4                                                         |           | -590.3970 | -592.2777 | 51.4285  |
| Root5                                                         |           | -590.3883 | -592.2571 | 64.3208  |
| Root6                                                         |           | -590.3782 | -592.2318 | 80.2383  |
| Root7                                                         |           | -590.3753 | -592.2825 | 48.3761  |
| Root8                                                         |           | -590.3535 | -592.2529 | 66.9764  |
| <b>Path-<math>S_0</math>-25</b>                               |           |           |           |          |
| Root1                                                         | -590.5361 | -590.5075 | -592.3425 | 10.7651  |
| Root2                                                         |           | -590.5067 | -592.3334 | 16.4433  |
| Root3                                                         |           | -590.4088 | -592.2568 | 64.4774  |
| Root4                                                         |           | -590.4080 | -592.2777 | 51.4285  |
| Root5                                                         |           | -590.3928 | -592.2571 | 64.3208  |
| Root6                                                         |           | -590.3861 | -592.2317 | 80.2383  |
| Root7                                                         |           | -590.3817 | -592.2825 | 48.3761  |
| Root8                                                         |           | -590.3622 | -592.2529 | 66.9764  |

| HBD(Radical) |           |           |           |         |
|--------------|-----------|-----------|-----------|---------|
| Root1        | -590.5369 | -590.5080 | -592.3421 | 11.0234 |
| Root2        |           | -590.5002 | -592.3282 | 19.7055 |
| Root3        |           | -590.4099 | -592.2634 | 60.3953 |
| Root4        |           | -590.4041 | -592.2531 | 66.8433 |
| Root5        |           | -590.3879 | -592.2821 | 48.6472 |
| Root6        |           | -590.3875 | -592.2483 | 69.8319 |
| Root7        |           | -590.3765 | -592.2418 | 73.9132 |
| Root8        |           | -590.3644 | -592.2320 | 80.0620 |

**Table S5-6** The absolute energies (A. E.) in Hartree and relative energies (R.E.) in kcal/mol for the three-dimensional PESs of para, ortho nucleophilic (a, b) and radical (c, d) addition reactions for parent molecule **1** respectively were computed along the concerted (red line) and stepwise (black line) pathways at the CASPT2//CASSCF(8,7)/6-31G\*\* level of theory. The corresponding energy profiles are plotted in Figure 4 of the main article.

|                       | CASSCF    | RASSCF    | CASPT2    |          |
|-----------------------|-----------|-----------|-----------|----------|
|                       | A.E.      | A.E.      | A.E.      | R.E.     |
| <b>(a)oxenium ion</b> |           |           |           |          |
| Root1                 | -360.9454 | -360.9646 | -362.0065 | 0        |
| Root2                 |           | -360.8906 | -361.9593 | 29.6233  |
| <b>TS(stepwise)</b>   |           |           |           |          |
| Root1                 | -360.9734 | -360.9595 | -362.0197 | -8.2760  |
| Root2                 |           | -360.7798 | -361.8857 | 75.7803  |
| <b>IM(concerted)</b>  |           |           |           |          |
| Root1                 | -360.9830 | -360.9728 | -362.0236 | -10.7790 |
| Root2                 |           | -360.8717 | -361.9405 | 41.3743  |
| <b>IM(stepwise)</b>   |           |           |           |          |
| Root1                 | -361.0265 | -361.0169 | -362.0703 | -39.9550 |
| Root2                 |           | -360.8748 | -361.9368 | 43.6916  |
| <b>o-aminophenol</b>  |           |           |           |          |
| Root1                 | -361.0164 | -361.0421 | -362.1113 | -65.762  |
| Root2                 |           | -360.8559 | -361.9362 | 44.1254  |
| <b>(b)oxenium ion</b> |           |           |           |          |
| Root1                 | -360.9454 | -360.9646 | -362.0065 | 0        |
| Root2                 |           | -360.8906 | -361.9593 | 29.6233  |
| <b>TS(stepwise)</b>   |           |           |           |          |
| Root1                 | -360.9503 | -360.9429 | -362.0009 | 5.3012   |
| Root2                 |           | -360.6472 | -361.7011 | 193.48   |
| <b>TS(concerted)</b>  |           |           |           |          |

|                      |           |           |           |          |
|----------------------|-----------|-----------|-----------|----------|
| Root1                | -360.9514 | -360.9291 | -361.9798 | 18.5822  |
| Root2                |           | -360.8384 | -361.9197 | 56.2749  |
| <b>IM(concerted)</b> |           |           |           |          |
| Root1                | -360.9569 | -360.9456 | -361.9871 | 14.0053  |
| Root2                |           | -360.8482 | -361.9259 | 52.3742  |
| <b>IM(stepwise)</b>  |           |           |           |          |
| Root1                | -361.0246 | -361.0169 | -362.0653 | -35.0600 |
| Root2                |           | -360.8748 | -361.8476 | 101.510  |
| <b>p-aminophenol</b> |           |           |           |          |
| Root1                | -361.0397 | -361.0421 | -362.1044 | -59.6510 |
| Root2                |           | -360.8559 | -361.9327 | 48.1402  |
| <b>(c)HBD</b>        |           |           |           |          |
| Root1                | -360.9399 | -360.9350 | -361.9986 | 0        |
| Root2                |           | -360.8504 | -361.9219 | 48.1385  |
| <b>TS(stepwise)</b>  |           |           |           |          |
| Root1                | -360.9260 | -360.9157 | -361.9834 | 9.5411   |
| Root2                |           | -360.7840 | -361.8655 | 83.5073  |
| <b>TS(concerted)</b> |           |           |           |          |
| Root1                | -360.9156 | -360.9104 | -361.9788 | 12.3804  |
| Root2                |           | -360.8203 | -361.8979 | 63.178   |
| <b>IM(concerted)</b> |           |           |           |          |
| Root1                | -360.9746 | -360.9628 | -362.0077 | -5.7224  |
| Root2                |           | -360.8512 | -361.9164 | 51.5982  |
| <b>IM(stepwise)</b>  |           |           |           |          |
| Root1                | -361.0315 | -361.0247 | -362.0775 | -49.5250 |
| Root2                |           | -360.8018 | -361.8743 | 77.9951  |
| <b>o-aminophenol</b> |           |           |           |          |
| Root1                | -361.0486 | -361.0459 | -362.1123 | -71.3600 |
| Root2                |           | -360.8637 | -361.9408 | 36.2537  |
| <b>(d)HBD</b>        |           |           |           |          |
| Root1                | -360.9399 | -360.9350 | -361.9986 | 0        |
| Root2                |           | -360.8504 | -361.9219 | 48.1385  |
| <b>TS(stepwise)</b>  |           |           |           |          |
| Root1                | -360.9527 | -360.9432 | -362.0035 | -3.3141  |
| Root2                |           | -360.7998 | -361.8655 | 83.2464  |

|                      |           |           |           |          |
|----------------------|-----------|-----------|-----------|----------|
| <b>TS(concerted)</b> |           |           |           |          |
| Root1                | -360.9325 | -360.9096 | -361.9659 | 20.2910  |
| Root2                |           | -360.8267 | -361.9111 | 54.6583  |
|                      |           |           |           |          |
| <b>IM(concerted)</b> |           |           |           |          |
| Root1                | -360.9716 | -360.9597 | -362.0057 | -4.7067  |
| Root2                |           | -360.8419 | -361.9088 | 56.0833  |
|                      |           |           |           |          |
| <b>IM(stepwise)</b>  |           |           |           |          |
| Root1                | -361.0155 | -361.0054 | -362.0613 | -39.5802 |
| Root2                |           | -360.8763 | -361.9453 | 33.1945  |
|                      |           |           |           |          |
| <b>p-aminophenol</b> |           |           |           |          |
| Root1                | -361.0397 | -361.0295 | -362.1051 | -67.0718 |
| Root2                |           | -360.8135 | -361.9367 | 38.5962  |

## **Section 6. Cartesian Coordinates**

### **Cartesian coordinates for 1 to produce oxenium ion**

#### **1 S<sub>0</sub>-min**

|   |              |              |              |
|---|--------------|--------------|--------------|
| C | 2.279745686  | 0.001790568  | 0.236324391  |
| C | 1.605209818  | -1.209660328 | 0.092503135  |
| C | 0.241618801  | -1.216080741 | -0.189901613 |
| C | -0.398596568 | -0.002739729 | -0.314550880 |
| C | 0.239122166  | 1.215045437  | -0.192323385 |
| C | 1.602320076  | 1.212089220  | 0.090279529  |
| H | 3.332654633  | 0.003084955  | 0.449090765  |
| H | 2.133801194  | -2.139648697 | 0.186969367  |
| H | -0.294307504 | -2.136689872 | -0.338450158 |
| H | -0.299055516 | 2.133828208  | -0.343967161 |
| H | 2.129204480  | 2.143265365  | 0.182638559  |
| O | -1.778141895 | -0.004950009 | -0.628653899 |
| N | -2.563361397 | 0.002808162  | 0.579221182  |
| H | -2.367184283 | -0.828127871 | 1.120282280  |
| H | -3.524761156 | 0.007159600  | 0.268187090  |
| H | -2.358206770 | 0.834404670  | 1.115945128  |

#### **1 Path-S<sub>PP</sub>(<sup>1</sup>ππ\*)-4**

|   |             |              |              |
|---|-------------|--------------|--------------|
| C | 2.321034243 | -0.002391129 | 0.245308677  |
| C | 1.600402946 | -1.243164874 | 0.091312582  |
| C | 0.229188377 | -1.216117778 | -0.193193696 |

|   |              |              |              |
|---|--------------|--------------|--------------|
| C | -0.405467514 | -0.021638338 | -0.316541726 |
| C | 0.209497759  | 1.235686779  | -0.195557878 |
| C | 1.623651100  | 1.251116566  | 0.094645046  |
| H | 3.367104643  | -0.007120841 | 0.456107392  |
| H | 2.123559778  | -2.171951894 | 0.181746145  |
| H | -0.307671730 | -2.136318426 | -0.341381342 |
| H | -0.328565988 | 2.144244004  | -0.368125588 |
| H | 2.146531711  | 2.176552074  | 0.184252945  |
| O | -1.768322148 | -0.008261801 | -0.630561800 |
| N | -2.564048592 | 0.003582986  | 0.580409830  |
| H | -2.367531741 | -0.827572378 | 1.119984253  |
| H | -3.523492332 | 0.008962581  | 0.264190902  |
| H | -2.357366812 | 0.836276042  | 1.114544920  |

### 1 Path-S<sub>PP</sub>(1ππ\*)-7

|   |              |              |              |
|---|--------------|--------------|--------------|
| C | 2.352717218  | -0.004760003 | 0.254518761  |
| C | 1.604015121  | -1.259671854 | 0.087486612  |
| C | 0.221980548  | -1.215684271 | -0.201535292 |
| C | -0.412877650 | -0.021426648 | -0.321612364 |
| C | 0.200642091  | 1.252857332  | -0.189955240 |
| C | 1.645142835  | 1.276442931  | 0.104640654  |
| H | 3.400726078  | -0.023912789 | 0.464347623  |
| H | 2.106857314  | -2.201856394 | 0.167397297  |
| H | -0.326505755 | -2.129109513 | -0.353705758 |
| H | -0.337575304 | 2.149479784  | -0.424714137 |
| H | 2.165671110  | 2.206086790  | 0.184471827  |
| O | -1.787519069 | -0.037452732 | -0.633518403 |
| N | -2.572581702 | 0.012545914  | 0.582660823  |
| H | -2.385009852 | -0.811574503 | 1.136362268  |
| H | -3.534864827 | 0.027455812  | 0.275621763  |
| H | -2.345714197 | 0.851020561  | 1.098959036  |

### 1 S<sub>PP</sub>(1ππ\*)-min

|   |             |              |              |
|---|-------------|--------------|--------------|
| C | 2.352106674 | 0.000358718  | 0.258632387  |
| C | 1.614626744 | -1.258502156 | 0.075448074  |
| C | 0.232545497 | -1.223909627 | -0.208499772 |

|   |              |              |              |
|---|--------------|--------------|--------------|
| C | -0.412534870 | -0.034396152 | -0.321531184 |
| C | 0.192296738  | 1.245819714  | -0.185448661 |
| C | 1.635632112  | 1.277276459  | 0.118484394  |
| H | 3.399235307  | -0.012040574 | 0.474600373  |
| H | 2.126936024  | -2.196376901 | 0.146320945  |
| H | -0.309776154 | -2.140448591 | -0.362127132 |
| H | -0.345604200 | 2.139363365  | -0.433053758 |
| H | 2.148576325  | 2.210613420  | 0.207833547  |
| O | -1.786792890 | -0.064395402 | -0.632297866 |
| N | -2.574495683 | 0.046454700  | 0.579074917  |
| H | -2.403045800 | -0.758974284 | 1.164237828  |
| H | -3.535117308 | 0.068086717  | 0.266533216  |
| H | -2.335592386 | 0.901120131  | 1.063729367  |

### 1 CI( $1\pi\pi^*/1\pi\sigma^*$ )

|   |              |              |              |
|---|--------------|--------------|--------------|
| C | 2.349438086  | 0.068630304  | 0.255835120  |
| C | 1.660810741  | -1.216637340 | 0.128351776  |
| C | 0.288686135  | -1.252948525 | -0.141585705 |
| C | -0.410030551 | -0.095122969 | -0.329949763 |
| C | 0.150571135  | 1.218591422  | -0.253458345 |
| C | 1.588567522  | 1.312186177  | 0.066743908  |
| H | 3.395105306  | 0.102865069  | 0.476592381  |
| H | 2.211190059  | -2.130222156 | 0.236703088  |
| H | -0.218658719 | -2.197212662 | -0.235527517 |
| H | -0.403446351 | 2.074859341  | -0.584960199 |
| H | 2.069223821  | 2.265143008  | 0.128420688  |
| O | -1.758683132 | -0.203962389 | -0.652157206 |
| N | -2.624895826 | 0.114011005  | 0.617720642  |
| H | -2.460376276 | -0.618754786 | 1.289927966  |
| H | -3.570033534 | 0.108137866  | 0.266947281  |
| H | -2.347526857 | 1.020611952  | 0.959487519  |

### 1 Path- $S_{CT}(1\pi\sigma^*)-16$

|   |             |              |              |
|---|-------------|--------------|--------------|
| C | 2.327854978 | 0.001544295  | 0.255124772  |
| C | 1.624814507 | -1.235912960 | 0.062961664  |
| C | 0.267486647 | -1.254525161 | -0.192540311 |



|   |              |              |              |
|---|--------------|--------------|--------------|
| C | -0.453585065 | -0.046737689 | -0.327953245 |
| C | 0.166248693  | 1.230092259  | -0.163904656 |
| C | 1.603680930  | 1.265914526  | 0.148438332  |
| H | 3.379171694  | 0.005086541  | 0.469737546  |
| H | 2.158650934  | -2.169870899 | 0.111883269  |
| H | -0.269305944 | -2.175628374 | -0.350317427 |
| H | -0.375515073 | 2.121254925  | -0.426365025 |
| H | 2.107384739  | 2.209439758  | 0.263669983  |
| O | -1.731515770 | -0.124182512 | -0.641584191 |
| N | -2.648025306 | 0.140325597  | 0.688261345  |
| H | -2.492284235 | -0.632513871 | 1.296381346  |
| H | -3.574231730 | 0.169679627  | 0.321539752  |
| H | -2.346176042 | 1.012611094  | 1.060715660  |

### 1 Cl(1πσ\*/1nσ\*)

|   |              |              |              |
|---|--------------|--------------|--------------|
| C | 2.348848969  | 0.076822054  | 0.280402716  |
| C | 1.684760356  | -1.206672916 | 0.147112372  |
| C | 0.303131469  | -1.256301874 | -0.157309928 |
| C | -0.415310772 | -0.087845839 | -0.360453018 |
| C | 0.176172614  | 1.204228393  | -0.272706264 |
| C | 1.603164976  | 1.298376603  | 0.073256548  |
| H | 3.395160901  | 0.113421765  | 0.519515895  |
| H | 2.229012759  | -2.129540888 | 0.271171689  |
| H | -0.213670971 | -2.195658410 | -0.271662071 |
| H | -0.394926665 | 2.066054218  | -0.588819102 |
| H | 2.076619062  | 2.264992076  | 0.140234233  |
| O | -1.696156120 | -0.199155340 | -0.703144402 |
| N | -2.700154801 | 0.115222031  | 0.665825531  |
| H | -2.545048626 | -0.609327192 | 1.324022861  |
| H | -3.618913288 | 0.091320486  | 0.291862785  |
| H | -2.462305762 | 1.010965442  | 1.015790978  |

### 1 Path-S<sub>CT</sub>(1πσ\*)-21

|   |             |              |              |
|---|-------------|--------------|--------------|
| C | 2.363586000 | 0.104916999  | 0.280291002  |
| C | 1.754338999 | -1.165054999 | 0.160818998  |
| C | 0.424527998 | -1.272872001 | -0.159095002 |

|   |              |              |              |
|---|--------------|--------------|--------------|
| C | -0.335012999 | -0.112075000 | -0.328009999 |
| C | 0.238929000  | 1.163129000  | -0.236678001 |
| C | 1.582955999  | 1.280609001  | 0.069369999  |
| H | 3.412969001  | 0.178232999  | 0.516007001  |
| H | 2.332302999  | -2.049118001 | 0.334520001  |
| H | -0.039730998 | -2.229486997 | -0.276692998 |
| H | -0.353134001 | 2.028552998  | -0.448968001 |
| H | 2.039858002  | 2.246122002  | 0.132302001  |
| O | -1.590096002 | -0.262114001 | -0.679157998 |
| N | -2.940983002 | 0.150978000  | 0.582905001  |
| H | -2.830519997 | -0.567998999 | 1.272998998  |
| H | -3.662238998 | -0.026507002 | -0.093223002 |
| H | -2.879134998 | 1.096079999  | 0.911202000  |

**1 STC( ${}^1\pi\sigma^*/{}^3n\pi^*/{}^3\pi\pi^*$ )**

|   |              |              |              |
|---|--------------|--------------|--------------|
| C | 2.375852000  | 0.122894002  | 0.287155002  |
| C | 1.804649997  | -1.157736002 | 0.180688000  |
| C | 0.466088002  | -1.295296998 | -0.139226000 |
| C | -0.332216001 | -0.119846000 | -0.380049999 |
| C | 0.239735000  | 1.161142998  | -0.238324002 |
| C | 1.629583002  | 1.259828999  | 0.088810003  |
| H | 3.419246001  | 0.211394997  | 0.515738999  |
| H | 2.417838003  | -2.026097002 | 0.324351998  |
| H | 0.003680999  | -2.256352998 | -0.273079998 |
| H | -0.351620999 | 2.032581000  | -0.445516998 |
| H | 2.093608001  | 2.226848001  | 0.161925000  |
| O | -1.518258000 | -0.283005998 | -0.807038999 |
| N | -3.056919000 | 0.191984998  | 0.699805997  |
| H | -2.950876002 | -0.544467000 | 1.363923000  |
| H | -3.628999999 | -0.001650001 | -0.094042999 |
| H | -3.068991999 | 1.127067000  | 1.046943002  |

**1 CI ( ${}^1\pi\sigma^*/S_0$ )**

|   |             |              |              |
|---|-------------|--------------|--------------|
| C | 2.297230406 | 0.316637583  | 0.426197761  |
| C | 1.859123350 | -1.027130516 | 0.405075671  |
| C | 0.608286512 | -1.319863501 | -0.042411005 |

|   |              |              |              |
|---|--------------|--------------|--------------|
| C | -0.268843020 | -0.253188494 | -0.502790593 |
| C | 0.200855050  | 1.119185455  | -0.433910280 |
| C | 1.450859250  | 1.375584194  | 0.012393171  |
| H | 3.298990630  | 0.543226445  | 0.753731561  |
| H | 2.527476284  | -1.801317339 | 0.728306605  |
| H | 0.238242835  | -2.326163495 | -0.105703017 |
| H | -0.447217198 | 1.898041505  | -0.786665707 |
| H | 1.822389267  | 2.380684352  | 0.043388873  |
| O | -1.348688934 | -0.524581019 | -0.946204016 |
| N | -3.284928867 | 0.229391778  | 0.778349998  |
| H | -3.147686350 | -0.493195406 | 1.434329520  |
| H | -2.933022795 | 0.148633602  | -0.128210104 |
| H | -3.902549885 | 0.964222936  | 1.002721713  |

### 1 Path-S<sub>0</sub>-33

|   |              |              |              |
|---|--------------|--------------|--------------|
| C | 2.290711244  | 0.317087927  | 0.424323448  |
| C | 1.868235549  | -1.039748536 | 0.409150965  |
| C | 0.620202716  | -1.333164996 | -0.036660310 |
| C | -0.269878846 | -0.258185964 | -0.503580079 |
| C | 0.203724265  | 1.133747577  | -0.436044675 |
| C | 1.459828629  | 1.393150957  | 0.013471010  |
| H | 3.289669866  | 0.540730638  | 0.761158199  |
| H | 2.544562264  | -1.804518899 | 0.739724457  |
| H | 0.243479444  | -2.337802394 | -0.089554196 |
| H | -0.467516150 | 1.904843756  | -0.763935983 |
| H | 1.842890240  | 2.394542086  | 0.059435447  |
| O | -1.355164286 | -0.532244085 | -0.964895202 |
| N | -3.258632536 | 0.255140318  | 0.797884010  |
| H | -3.315939511 | -0.568610077 | 1.356904311  |
| H | -3.221956483 | 0.039158900  | -0.172931401 |
| H | -4.016326439 | 0.871634147  | 0.996997793  |

### 1 T<sub>PP</sub>(1 $\pi\pi^*$ )-min

|   |             |              |              |
|---|-------------|--------------|--------------|
| C | 2.048857079 | 0.296968109  | 0.723310050  |
| C | 1.753456850 | -1.027572125 | 0.397075950  |
| C | 0.589154045 | -1.371603018 | -0.360063415 |

|   |              |              |              |
|---|--------------|--------------|--------------|
| C | -0.315667947 | -0.342573466 | -0.815237674 |
| C | 0.006804547  | 1.010524199  | -0.445433011 |
| C | 1.186047990  | 1.297365684  | 0.313193593  |
| H | 2.931671636  | 0.525513047  | 1.288917761  |
| H | 2.411842504  | -1.816862159 | 0.716773558  |
| H | 0.377699444  | -2.397374676 | -0.598893452 |
| H | -0.656777727 | 1.796899085  | -0.744410628 |
| H | 1.399559622  | 2.319798546  | 0.566430830  |
| O | -1.312167126 | -0.633206442 | -1.490327639 |
| N | -2.626892010 | 0.616045266  | 1.290556427  |
| H | -2.787160330 | -0.113191392 | 1.960628563  |
| H | -3.298021199 | 0.475107606  | 0.558096854  |
| H | -2.882316618 | 1.472107738  | 1.746007082  |

### 1 T<sub>NP</sub>(1nπ\*)-min

|   |              |              |              |
|---|--------------|--------------|--------------|
| C | 2.157905821  | 0.395187933  | 0.579251159  |
| C | 1.897376049  | -1.000851876 | 0.350363905  |
| C | 0.754393282  | -1.426306934 | -0.218854655 |
| C | -0.211360925 | -0.427739205 | -0.585798887 |
| C | 0.011948348  | 0.986555052  | -0.351586858 |
| C | 1.206430162  | 1.363298386  | 0.221443464  |
| H | 3.086562864  | 0.687339211  | 1.030443901  |
| H | 2.640153954  | -1.720435296 | 0.643173951  |
| H | 0.536131141  | -2.459042241 | -0.407303348 |
| H | -0.765754802 | 1.671399171  | -0.619434726 |
| H | 1.401400741  | 2.403607792  | 0.399309072  |
| O | -1.270784481 | -0.780275378 | -1.148603244 |
| N | -3.020564867 | 0.692082634  | 0.784487253  |
| H | -3.075616928 | 0.101226850  | 1.593462808  |
| H | -3.799952005 | 0.443138740  | 0.203806178  |
| H | -3.201951826 | 1.623799979  | 1.109053631  |

### 1 oxenium ion

|   |             |              |              |
|---|-------------|--------------|--------------|
| C | 1.893096042 | 0.431851420  | 0.728375118  |
| C | 1.723580683 | -0.975652725 | 0.533266016  |
| C | 0.667632883 | -1.415351790 | -0.196794548 |

|   |              |              |              |
|---|--------------|--------------|--------------|
| C | -0.277968310 | -0.440819332 | -0.789550045 |
| C | -0.070033959 | 1.000810139  | -0.503088266 |
| C | 1.010621424  | 1.406077577  | 0.221642375  |
| H | 2.746470134  | 0.763018739  | 1.297028170  |
| H | 2.440369523  | -1.649495625 | 0.962736434  |
| H | 0.490788310  | -2.456729816 | -0.392159173 |
| H | -0.777337074 | 1.688938317  | -0.921918950 |
| H | 1.199780505  | 2.443415965  | 0.422584919  |
| O | -1.175280603 | -0.806049670 | -1.518166659 |
| N | -2.511312391 | 0.626315337  | 1.148481549  |
| H | -2.624514432 | -0.069792245 | 1.862098411  |
| H | -3.235095705 | 0.454483946  | 0.474533130  |
| H | -2.730854532 | 1.504979339  | 1.580109988  |

### **Cartesian coordinates for 2 to produce oxenium ion**

#### **2 S<sub>0</sub>-Min**

|   |              |              |              |
|---|--------------|--------------|--------------|
| C | -0.550195047 | -0.993438531 | -0.693601024 |
| C | -1.924331407 | -0.953882722 | -0.789153057 |
| C | -2.587140823 | 0.154664233  | -0.291077331 |
| C | -1.925892279 | 1.225593083  | 0.286098364  |
| C | -0.537814358 | 1.165345332  | 0.376382854  |
| C | 0.170065593  | 0.057145324  | -0.107459640 |
| H | -0.020273729 | -1.833504456 | -1.102124262 |
| H | -2.469134900 | -1.744221977 | -1.275066462 |
| H | -2.469257394 | 2.086412736  | 0.633450404  |
| O | -3.993048948 | 0.211551504  | -0.410880240 |
| N | -4.616259099 | -0.370938700 | 0.753187493  |
| H | -5.609762931 | -0.300806277 | 0.583485408  |
| H | -4.335917313 | -1.337887305 | 0.842138151  |
| H | -4.356821910 | 0.153279064  | 1.577405618  |
| C | 1.655040921  | 0.001164789  | -0.012996717 |
| C | 2.297120189  | -1.162270045 | 0.419868264  |
| C | 2.431186388  | 1.113321097  | -0.356962530 |
| C | 3.686316340  | -1.208114432 | 0.509864326  |
| H | 1.718812436  | -2.022686767 | 0.707873818  |

|   |              |              |              |
|---|--------------|--------------|--------------|
| C | 3.805875616  | 1.064071538  | -0.271274647 |
| H | 1.955148118  | 2.009258831  | -0.714850882 |
| C | 4.442824336  | -0.093359783 | 0.163359682  |
| H | 4.170187338  | -2.104832994 | 0.852364877  |
| H | 4.387564769  | 1.924584645  | -0.548983533 |
| H | 5.515069573  | -0.126447045 | 0.229578674  |
| H | -0.005741576 | 1.979571172  | 0.831166423  |

## 2 Path-S<sub>CT</sub>(<sup>1</sup>πσ\*)-4

|   |              |              |              |
|---|--------------|--------------|--------------|
| C | -0.515473811 | -1.062212348 | -0.675558138 |
| C | -1.973505906 | -1.025383559 | -0.796293012 |
| C | -2.612797670 | 0.180618497  | -0.315173545 |
| C | -1.904335651 | 1.239584794  | 0.281979542  |
| C | -0.546341171 | 1.207536237  | 0.361714275  |
| C | 0.207924523  | 0.064331870  | -0.094570737 |
| H | 0.028131957  | -1.893092084 | -1.077613454 |
| H | -2.504844321 | -1.717209384 | -1.418760940 |
| H | -2.453942010 | 2.096864309  | 0.628139877  |
| O | -3.971440370 | 0.269267076  | -0.409457106 |
| N | -4.641713483 | -0.397467313 | 0.789392853  |
| H | -5.626669562 | -0.330038790 | 0.596215100  |
| H | -4.330371064 | -1.352719349 | 0.828583641  |
| H | -4.384690998 | 0.118731504  | 1.612909749  |
| C | 1.655436581  | 0.010059788  | -0.005118950 |
| C | 2.306696011  | -1.173906981 | 0.401966224  |
| C | 2.443268949  | 1.133827191  | -0.331179122 |
| C | 3.690628034  | -1.215892735 | 0.504463968  |
| H | 1.726711169  | -2.037620816 | 0.673756586  |
| C | 3.811606044  | 1.071451815  | -0.267324636 |
| H | 1.966655749  | 2.034803656  | -0.674605079 |
| C | 4.448642830  | -0.095729131 | 0.162117297  |
| H | 4.176086220  | -2.113195577 | 0.843370584  |
| H | 4.398729117  | 1.927204157  | -0.548947671 |
| H | 5.521353605  | -0.130491830 | 0.225151609  |
| H | -0.022427697 | 2.034168516  | 0.802159953  |

## 2 Path-S<sub>CT</sub>(<sup>1</sup>πσ\*)-8

|   |              |              |              |
|---|--------------|--------------|--------------|
| C | -0.527014737 | -1.051034320 | -0.666188282 |
| C | -1.963048284 | -1.006442099 | -0.792909421 |
| C | -2.628362228 | 0.170859180  | -0.339519698 |
| C | -1.894219110 | 1.239424855  | 0.281940579  |
| C | -0.541112757 | 1.199006101  | 0.355828121  |
| C | 0.202068845  | 0.061528404  | -0.094171477 |
| H | 0.015899875  | -1.894932912 | -1.056989078 |
| H | -2.501101032 | -1.737355363 | -1.369623096 |
| H | -2.446943513 | 2.096451668  | 0.622869891  |
| O | -3.922018295 | 0.301780329  | -0.466586589 |
| N | -4.685280217 | -0.438746491 | 0.861551579  |
| H | -5.634345225 | -0.330270104 | 0.595934314  |
| H | -4.360030586 | -1.373978860 | 0.857218337  |
| H | -4.413568989 | 0.101721750  | 1.645910555  |
| C | 1.648573470  | 0.011523496  | -0.006770323 |
| C | 2.309616255  | -1.178579002 | 0.400167223  |
| C | 2.445761369  | 1.138735660  | -0.328675587 |
| C | 3.689289993  | -1.219092019 | 0.503593902  |
| H | 1.728089183  | -2.041575024 | 0.672394314  |
| C | 3.808730580  | 1.075948128  | -0.266654635 |
| H | 1.967743891  | 2.038991004  | -0.671153441 |
| C | 4.450930220  | -0.096815844 | 0.162409973  |
| H | 4.175663719  | -2.116132918 | 0.842249776  |
| H | 4.397963467  | 1.930692789  | -0.548256475 |
| H | 5.524926081  | -0.131185555 | 0.224836759  |
| H | -0.015566873 | 2.027589737  | 0.795053944  |

## 2 Path-S<sub>CT</sub>(<sup>1</sup>πσ\*)-11

|   |              |              |              |
|---|--------------|--------------|--------------|
| C | -0.533376038 | -1.036821905 | -0.655603610 |
| C | -1.948633136 | -0.981868949 | -0.790634700 |
| C | -2.608595907 | 0.165361612  | -0.340622239 |
| C | -1.888522067 | 1.230410178  | 0.274995512  |
| C | -0.534682195 | 1.192456676  | 0.352371800  |
| C | 0.193684618  | 0.054994533  | -0.096341866 |

|   |              |              |              |
|---|--------------|--------------|--------------|
| H | -0.003747024 | -1.892809144 | -1.034417435 |
| H | -2.494174763 | -1.749948717 | -1.306895785 |
| H | -2.445261524 | 2.083391425  | 0.616357756  |
| O | -3.906022156 | 0.332544295  | -0.533499029 |
| N | -4.717067339 | -0.474133842 | 0.926119819  |
| H | -5.644186705 | -0.332984404 | 0.603649893  |
| H | -4.401463974 | -1.413052758 | 0.918032503  |
| H | -4.449993343 | 0.073472739  | 1.707360188  |
| C | 1.643746759  | 0.011147752  | -0.010164698 |
| C | 2.311017696  | -1.184017018 | 0.398904626  |
| C | 2.444411861  | 1.143880263  | -0.327725352 |
| C | 3.688886538  | -1.223844009 | 0.503800294  |
| H | 1.728342500  | -2.046398167 | 0.671009627  |
| C | 3.805100932  | 1.080816913  | -0.266679445 |
| H | 1.966225745  | 2.044222566  | -0.669226686 |
| C | 4.451979679  | -0.098559979 | 0.163008732  |
| H | 4.175255433  | -2.120624818 | 0.843372616  |
| H | 4.395021501  | 1.935453850  | -0.548665593 |
| H | 5.526309350  | -0.131829310 | 0.225179044  |
| H | -0.007913197 | 2.018878278  | 0.792411836  |

## 2 Path-Scr( $^1\pi\sigma^*$ )-14

|   |              |              |              |
|---|--------------|--------------|--------------|
| C | -0.528069555 | -1.028906752 | -0.638275849 |
| C | -1.927275177 | -0.956342814 | -0.790062125 |
| C | -2.594439807 | 0.187234245  | -0.361616641 |
| C | -1.877841968 | 1.236581141  | 0.262595912  |
| C | -0.526719577 | 1.184958747  | 0.354413815  |
| C | 0.189974034  | 0.047951651  | -0.097022183 |
| H | -0.007641914 | -1.895234903 | -0.996992353 |
| H | -2.474099292 | -1.742101908 | -1.274903565 |
| H | -2.426656916 | 2.094500453  | 0.599312073  |
| O | -3.881037677 | 0.367939639  | -0.643456849 |
| N | -4.771620936 | -0.531662265 | 1.041089164  |
| H | -5.677418877 | -0.354227475 | 0.655628857  |
| H | -4.480748294 | -1.488036973 | 1.048355456  |
| H | -4.524633842 | 0.012188280  | 1.843355450  |



|   |             |              |              |
|---|-------------|--------------|--------------|
| C | 1.650939056 | 0.005118192  | -0.013583378 |
| C | 2.310602763 | -1.187337759 | 0.394740567  |
| C | 2.435361459 | 1.142002424  | -0.326693334 |
| C | 3.690777601 | -1.227911334 | 0.500134700  |
| H | 1.726612810 | -2.049021003 | 0.662876130  |
| C | 3.799490452 | 1.082273257  | -0.261581187 |
| H | 1.952994393 | 2.042151367  | -0.661354343 |
| C | 4.446071648 | -0.098473446 | 0.162862688  |
| H | 4.179267755 | -2.124299477 | 0.837138384  |
| H | 4.388122029 | 1.939623507  | -0.535384916 |
| H | 5.519191281 | -0.128049291 | 0.225450387  |
| H | 0.007427586 | 2.003445136  | 0.797867426  |

**2 STC( $1\pi\sigma^*/3n\pi^*/3\pi\pi^*$ )**

|   |              |              |              |
|---|--------------|--------------|--------------|
| C | -0.543242420 | -1.040265553 | -0.638187910 |
| C | -1.906811041 | -0.971822963 | -0.794262401 |
| C | -2.633812849 | 0.215109345  | -0.400235432 |
| C | -1.869369655 | 1.258093885  | 0.264322138  |
| C | -0.530919867 | 1.191290649  | 0.358542881  |
| C | 0.196099531  | 0.047911287  | -0.094553242 |
| H | -0.010030944 | -1.899331412 | -0.995587128 |
| H | -2.450714981 | -1.746793027 | -1.297006849 |
| H | -2.410101458 | 2.121702529  | 0.598831892  |
| O | -3.827896374 | 0.381109952  | -0.681688720 |
| N | -4.812433138 | -0.569409971 | 1.114201812  |
| H | -5.646981766 | -0.322167091 | 0.601060628  |
| H | -4.479666185 | -1.519456322 | 1.068034399  |
| H | -4.522528680 | 0.017349878  | 1.880820294  |
| C | 1.653985614  | 0.000765453  | -0.010929112 |
| C | 2.306961102  | -1.184034941 | 0.390257929  |
| C | 2.431519637  | 1.135638983  | -0.322618253 |
| C | 3.691456339  | -1.222471879 | 0.496540518  |
| H | 1.728672321  | -2.049061342 | 0.657103394  |
| C | 3.802122839  | 1.076428600  | -0.257827778 |
| H | 1.951795743  | 2.037832349  | -0.655453980 |
| C | 4.441613991  | -0.094804538 | 0.161591848  |

|   |             |              |              |
|---|-------------|--------------|--------------|
| H | 4.179591770 | -2.118792324 | 0.830917784  |
| H | 4.386766092 | 1.936093615  | -0.529239882 |
| H | 5.513127757 | -0.124850811 | 0.224805002  |
| H | 0.012731962 | 1.999746118  | 0.807826462  |

## 2 Cl ( $1\pi\sigma^*/S_0$ )

|   |              |              |              |
|---|--------------|--------------|--------------|
| C | -0.539603792 | -1.037018018 | -0.630138198 |
| C | -1.876568863 | -0.929531250 | -0.868457088 |
| C | -2.588653609 | 0.283969504  | -0.523380087 |
| C | -1.826616097 | 1.351116704  | 0.103834097  |
| C | -0.501650446 | 1.219926494  | 0.305929678  |
| C | 0.199053702  | 0.048991512  | -0.073197093 |
| H | -0.008590187 | -1.915926834 | -0.936853497 |
| H | -2.414191792 | -1.700718718 | -1.378743324 |
| H | -2.349425608 | 2.243517174  | 0.377309944  |
| O | -3.806497939 | 0.384904917  | -0.687075935 |
| N | -4.981597775 | -0.719384598 | 1.360990893  |
| H | -4.701431485 | -0.287969458 | 0.429841891  |
| H | -5.142375381 | -1.734526942 | 1.450448375  |
| H | -5.073435439 | -0.128088344 | 2.201976866  |
| C | 1.660196128  | -0.012899197 | 0.025488468  |
| C | 2.316950328  | -1.197705770 | 0.384977443  |
| C | 2.426453416  | 1.122206967  | -0.271797543 |
| C | 3.704573775  | -1.229307510 | 0.465835856  |
| H | 1.749494001  | -2.072324016 | 0.635557513  |
| C | 3.800613101  | 1.074593143  | -0.223338627 |
| H | 1.939734931  | 2.025385629  | -0.585467987 |
| C | 4.448449538  | -0.096359007 | 0.155677032  |
| H | 4.200106115  | -2.132612968 | 0.764752731  |
| H | 4.371875388  | 1.946267497  | -0.481406033 |
| H | 5.518004019  | -0.125852134 | 0.204199869  |
| H | 0.047739419  | 2.014463903  | 0.770225212  |

## 2 Path-S<sub>0</sub>-22

|   |              |              |              |
|---|--------------|--------------|--------------|
| C | -0.541267002 | -1.045640999 | -0.631514001 |
| C | -1.869535002 | -0.936164000 | -0.872240002 |

|   |              |              |              |
|---|--------------|--------------|--------------|
| C | -2.587858001 | 0.282839001  | -0.521885001 |
| C | -1.819025002 | 1.357464000  | 0.106138002  |
| C | -0.504093999 | 1.231890001  | 0.307451003  |
| C | 0.209563001  | 0.047488001  | -0.074972002 |
| H | -0.009607001 | -1.925800001 | -0.933840001 |
| H | -2.421059999 | -1.710717998 | -1.370004998 |
| H | -2.355091001 | 2.244551001  | 0.388368999  |
| O | -3.779632001 | 0.390773998  | -0.696856998 |
| N | -4.976831999 | -0.724170000 | 1.369594997  |
| H | -4.837939000 | -0.326271001 | 0.491501998  |
| H | -5.165669001 | -1.690466999 | 1.447032002  |
| H | -5.100403999 | -0.151132001 | 2.164380997  |
| C | 1.651779998  | -0.012275002 | 0.024950998  |
| C | 2.318021002  | -1.202631002 | 0.383570001  |
| C | 2.427881999  | 1.127076001  | -0.270135000 |
| C | 3.702339002  | -1.232247000 | 0.467042003  |
| H | 1.752472999  | -2.080022000 | 0.636275998  |
| C | 3.798016000  | 1.077242998  | -0.224532002 |
| H | 1.944155000  | 2.033565000  | -0.582126000 |
| C | 4.448228998  | -0.096491000 | 0.155644999  |
| H | 4.198468999  | -2.135510002 | 0.767727998  |
| H | 4.371132000  | 1.947641998  | -0.483544998 |
| H | 5.520993998  | -0.126219003 | 0.204766999  |
| H | 0.047335000  | 2.021673001  | 0.776573000  |

## 2 Path-S<sub>0</sub>-25

|   |              |              |              |
|---|--------------|--------------|--------------|
| C | -0.531036000 | -1.067092998 | -0.622504002 |
| C | -1.857841000 | -0.953549002 | -0.870538999 |
| C | -2.583287000 | 0.280828000  | -0.519743998 |
| C | -1.807278003 | 1.367291002  | 0.116543002  |
| C | -0.488039999 | 1.258336999  | 0.297412002  |
| C | 0.217102999  | 0.052312002  | -0.085783998 |
| H | 0.002344001  | -1.954135003 | -0.903987001 |
| H | -2.420520000 | -1.740217000 | -1.337272999 |
| H | -2.354958998 | 2.241161002  | 0.419801000  |
| O | -3.766405999 | 0.416119001  | -0.745830998 |

|   |              |              |              |
|---|--------------|--------------|--------------|
| N | -4.947751000 | -0.746171000 | 1.403872999  |
| H | -5.372522001 | -0.368961000 | 0.579670998  |
| H | -5.330966998 | -1.665217999 | 1.524642000  |
| H | -5.286155998 | -0.198789000 | 2.173326998  |
| C | 1.648055998  | -0.011533000 | 0.022790997  |
| C | 2.311750998  | -1.213940002 | 0.367023999  |
| C | 2.423805000  | 1.140968999  | -0.252934998 |
| C | 3.694104998  | -1.239200997 | 0.468639001  |
| H | 1.746655002  | -2.094605998 | 0.610454001  |
| C | 3.791832998  | 1.082390999  | -0.224105999 |
| H | 1.941833997  | 2.054002000  | -0.548629000 |
| C | 4.436731997  | -0.097988000 | 0.155167999  |
| H | 4.192492000  | -2.139799000 | 0.774522999  |
| H | 4.370153001  | 1.949310002  | -0.484051998 |
| H | 5.509780001  | -0.128092999 | 0.204754003  |
| H | 0.066763002  | 2.045369002  | 0.769464001  |

## 2 oxenium ion

|   |              |              |              |
|---|--------------|--------------|--------------|
| C | -0.667636693 | -1.042572808 | -0.478969817 |
| C | -1.985827428 | -0.919419863 | -0.753853330 |
| C | -2.646980472 | 0.396989989  | -0.703757327 |
| C | -1.831976795 | 1.533347701  | -0.217405572 |
| C | -0.530496726 | 1.395427642  | 0.036069002  |
| C | 0.137339351  | 0.112529542  | -0.126702586 |
| H | -0.197820061 | -1.998314085 | -0.581361375 |
| H | -2.583135094 | -1.757837829 | -1.055482981 |
| H | -2.335738021 | 2.474869345  | -0.095409970 |
| O | -3.786676721 | 0.563976575  | -1.079632075 |
| N | -4.136346225 | -1.048793810 | 1.731403383  |
| H | -4.985645113 | -0.957423992 | 1.205719905  |
| H | -4.119676131 | -1.984951312 | 2.089774250  |
| H | -4.227354240 | -0.443605605 | 2.525749500  |
| C | 1.550462875  | -0.000580518 | 0.038806706  |
| C | 2.171505094  | -1.262692387 | 0.242874847  |
| C | 2.383207495  | 1.150025677  | -0.026264787 |
| C | 3.542429268  | -1.357055438 | 0.387661812  |

|   |             |              |              |
|---|-------------|--------------|--------------|
| H | 1.584033965 | -2.153688310 | 0.336004423  |
| C | 3.741716303 | 1.041617167  | 0.085050616  |
| H | 1.960410246 | 2.116281595  | -0.214435258 |
| C | 4.330453520 | -0.206219956 | 0.299319501  |
| H | 3.999777532 | -2.312081533 | 0.564496385  |
| H | 4.357668175 | 1.917672896  | 0.005567177  |
| H | 5.398000483 | -0.282165892 | 0.397130227  |
| H | 0.030981090 | 2.232271216  | 0.396362427  |

### Cartesian coordinates for 3 to produce oxenium ion

#### 3 S<sub>0</sub>-Min

|   |              |              |              |
|---|--------------|--------------|--------------|
| C | 0.422748516  | 2.187366213  | 0.032205640  |
| C | 1.603750014  | 1.464729996  | -0.206160021 |
| C | 1.455907326  | 0.105781328  | -0.335421331 |
| C | 0.246168765  | -0.578156477 | -0.240170800 |
| C | -0.923793058 | 0.137092764  | -0.001677328 |
| C | -0.796922336 | 1.551927929  | 0.138186210  |
| H | 0.465785841  | 3.256460882  | 0.128135074  |
| H | 2.557103019  | 1.946057107  | -0.322156443 |
| H | 0.238125522  | -1.636089464 | -0.414428065 |
| H | -1.667267132 | 2.150037553  | 0.314351048  |
| O | 2.611811686  | -0.674659669 | -0.577892634 |
| N | 3.158034930  | -1.119243659 | 0.679152013  |
| H | 3.946754008  | -1.701970058 | 0.437832622  |
| H | 3.454687325  | -0.317796095 | 1.218511887  |
| H | 2.458421924  | -1.647448640 | 1.182357481  |
| N | -2.138745889 | -0.472368490 | 0.094916687  |
| C | -3.353202225 | 0.318331869  | 0.214018548  |
| H | -4.198890526 | -0.348087989 | 0.277081850  |
| H | -3.345354326 | 0.920273490  | 1.115888390  |
| H | -3.502682537 | 0.970775991  | -0.641826073 |
| C | -2.249325323 | -1.893215377 | -0.167651711 |
| H | -1.649331215 | -2.469507885 | 0.530797648  |
| H | -3.275433919 | -2.200281705 | -0.041800071 |
| H | -1.943424879 | -2.147010214 | -1.180060423 |

### 3 Path-S<sub>CT</sub>(<sup>1</sup>πσ\*)-4

|   |              |              |              |
|---|--------------|--------------|--------------|
| C | 0.429157495  | 2.201160324  | 0.032862964  |
| C | 1.608413325  | 1.477031462  | -0.205275070 |
| C | 1.470888143  | 0.087273099  | -0.347961094 |
| C | 0.249972254  | -0.596303219 | -0.238146788 |
| C | -0.934781365 | 0.150923069  | 0.002308158  |
| C | -0.815366741 | 1.545808597  | 0.139849774  |
| H | 0.468410091  | 3.265225523  | 0.122218964  |
| H | 2.563466264  | 1.952951725  | -0.328365769 |
| H | 0.234273143  | -1.643582238 | -0.433025045 |
| H | -1.674061932 | 2.147453776  | 0.316733777  |
| O | 2.628375209  | -0.667689198 | -0.580498250 |
| N | 3.164114579  | -1.122426194 | 0.687041893  |
| H | 3.950330585  | -1.705585116 | 0.450240967  |
| H | 3.459115274  | -0.321939362 | 1.223404131  |
| H | 2.453632018  | -1.644824392 | 1.176932091  |
| N | -2.128937933 | -0.467640495 | 0.092454319  |
| C | -3.355814678 | 0.319211663  | 0.215572462  |
| H | -4.198438979 | -0.350604701 | 0.278240324  |
| H | -3.336337690 | 0.920680718  | 1.115777850  |
| H | -3.492396294 | 0.968053634  | -0.642962931 |
| C | -2.249842261 | -1.897134612 | -0.166471906 |
| H | -1.648928193 | -2.466348030 | 0.532761176  |
| H | -3.277233164 | -2.197949642 | -0.038764304 |
| H | -1.946373174 | -2.142578588 | -1.178884470 |

### 3 Path-S<sub>CT</sub>(<sup>1</sup>πσ\*)-7

|   |              |              |              |
|---|--------------|--------------|--------------|
| C | 0.426110147  | 2.207891231  | 0.036180223  |
| C | 1.607197238  | 1.485809147  | -0.201909564 |
| C | 1.484757836  | 0.068192357  | -0.376320680 |
| C | 0.255041722  | -0.612661326 | -0.231730496 |
| C | -0.938513203 | 0.158416421  | 0.005848536  |
| C | -0.825280083 | 1.553368831  | 0.142346906  |
| H | 0.465471303  | 3.276535973  | 0.116421066  |
| H | 2.561716677  | 1.964109338  | -0.336271056 |

|   |              |              |              |
|---|--------------|--------------|--------------|
| H | 0.220710269  | -1.653295699 | -0.467869765 |
| H | -1.688821765 | 2.149917382  | 0.322757132  |
| O | 2.609300279  | -0.652495413 | -0.597972652 |
| N | 3.180469939  | -1.136404464 | 0.718142661  |
| H | 3.955041326  | -1.716561200 | 0.461875948  |
| H | 3.471796080  | -0.332631534 | 1.239624069  |
| H | 2.454580684  | -1.648288640 | 1.182165025  |
| N | -2.122392397 | -0.463017439 | 0.087359608  |
| C | -3.356973910 | 0.318941572  | 0.217118730  |
| H | -4.197244732 | -0.353481169 | 0.279842416  |
| H | -3.332947908 | 0.919711884  | 1.117480890  |
| H | -3.490563203 | 0.966837320  | -0.642343714 |
| C | -2.249873847 | -1.900216725 | -0.165860952 |
| H | -1.647949406 | -2.467554724 | 0.533139247  |
| H | -3.278964997 | -2.192429831 | -0.033422727 |
| H | -1.952434846 | -2.144953848 | -1.179734381 |

### 3 Path-S<sub>CT</sub>(<sup>1</sup>πσ\*)-10

|   |              |              |              |
|---|--------------|--------------|--------------|
| C | 0.415378001  | 2.202236798  | 0.037831214  |
| C | 1.599756821  | 1.479851024  | -0.201374187 |
| C | 1.496685925  | 0.059190019  | -0.387165106 |
| C | 0.263873344  | -0.606504380 | -0.234741750 |
| C | -0.943005907 | 0.153536653  | 0.007218838  |
| C | -0.818958722 | 1.567563968  | 0.143604255  |
| H | 0.458761858  | 3.274471890  | 0.122527514  |
| H | 2.553483954  | 1.960655647  | -0.337163006 |
| H | 0.228684610  | -1.658105423 | -0.455642576 |
| H | -1.689840860 | 2.158607356  | 0.322371529  |
| O | 2.574764130  | -0.627769786 | -0.652521999 |
| N | 3.209790206  | -1.160401843 | 0.784564338  |
| H | 3.956735757  | -1.717738868 | 0.457311910  |
| H | 3.491690303  | -0.346002159 | 1.264809541  |
| H | 2.479078024  | -1.665800110 | 1.210904382  |
| N | -2.118169790 | -0.459615273 | 0.084567107  |
| C | -3.357420414 | 0.319542314  | 0.218004839  |
| H | -4.195250358 | -0.355294904 | 0.280595654  |

|   |              |              |              |
|---|--------------|--------------|--------------|
| H | -3.335557741 | 0.917894796  | 1.119524800  |
| H | -3.494493318 | 0.965586054  | -0.641743135 |
| C | -2.249459411 | -1.901348905 | -0.165396473 |
| H | -1.648509857 | -2.468883345 | 0.533934489  |
| H | -3.279032763 | -2.189533554 | -0.030609322 |
| H | -1.955226219 | -2.146718543 | -1.179831443 |

### 3 Path-S<sub>CT</sub>(<sup>1</sup>πσ\*)-13

|   |              |              |              |
|---|--------------|--------------|--------------|
| C | 0.400186498  | 2.195949839  | 0.040843948  |
| C | 1.591686693  | 1.458743668  | -0.203495114 |
| C | 1.505349573  | 0.082359075  | -0.386410045 |
| C | 0.265555817  | -0.597288796 | -0.242368958 |
| C | -0.946988987 | 0.154153999  | 0.008609570  |
| C | -0.818104762 | 1.579215557  | 0.145925555  |
| H | 0.451061229  | 3.267212679  | 0.132139206  |
| H | 2.538165659  | 1.947730381  | -0.335141019 |
| H | 0.246224574  | -1.659172139 | -0.429011129 |
| H | -1.687313679 | 2.171034459  | 0.321146134  |
| O | 2.551606206  | -0.617826122 | -0.724564851 |
| N | 3.240214352  | -1.183257421 | 0.855887711  |
| H | 3.974684640  | -1.724424901 | 0.468480724  |
| H | 3.529337005  | -0.362258535 | 1.328312023  |
| H | 2.521699971  | -1.705002894 | 1.291601928  |
| N | -2.116040613 | -0.457631440 | 0.080733503  |
| C | -3.357186639 | 0.320238991  | 0.219306843  |
| H | -4.191474165 | -0.358378078 | 0.282009998  |
| H | -3.336671897 | 0.916294976  | 1.122235886  |
| H | -3.499204398 | 0.966210832  | -0.639471710 |
| C | -2.248380387 | -1.901790806 | -0.164586153 |
| H | -1.649688319 | -2.470026357 | 0.535919687  |
| H | -3.278621730 | -2.185153427 | -0.026467290 |
| H | -1.958789323 | -2.150429170 | -1.179380806 |

### 3 Path-S<sub>CT</sub>(<sup>1</sup>πσ\*)-16

|   |             |             |              |
|---|-------------|-------------|--------------|
| C | 0.391433382 | 2.186801798 | 0.046207628  |
| C | 1.592001834 | 1.451306590 | -0.207351088 |



|   |              |              |              |
|---|--------------|--------------|--------------|
| C | 1.522827080  | 0.113389255  | -0.398769907 |
| C | 0.250746372  | -0.584936433 | -0.248645062 |
| C | -0.956503218 | 0.157944315  | 0.008382371  |
| C | -0.828705320 | 1.580189810  | 0.149458340  |
| H | 0.446884365  | 3.257107076  | 0.142896063  |
| H | 2.530251591  | 1.950838827  | -0.329902123 |
| H | 0.249018497  | -1.651428683 | -0.405946880 |
| H | -1.693592748 | 2.177891866  | 0.323763004  |
| O | 2.532351483  | -0.614072636 | -0.797847777 |
| N | 3.271814743  | -1.206332603 | 0.923276576  |
| H | 4.021165400  | -1.744986612 | 0.550532049  |
| H | 3.599072411  | -0.419801162 | 1.438852049  |
| H | 2.631377750  | -1.765128447 | 1.440687188  |
| N | -2.119908809 | -0.456807373 | 0.075740424  |
| C | -3.357246865 | 0.320145301  | 0.221663081  |
| H | -4.190965049 | -0.358201183 | 0.285246018  |
| H | -3.333965267 | 0.912356405  | 1.126909104  |
| H | -3.503705278 | 0.969027055  | -0.633977184 |
| C | -2.247172635 | -1.901390853 | -0.163030146 |
| H | -1.648308384 | -2.465964366 | 0.539732446  |
| H | -3.276891993 | -2.183273176 | -0.021251507 |
| H | -1.960696975 | -2.154466777 | -1.177262446 |

### 3 Path-S<sub>CT</sub>(<sup>1</sup>πσ\*)-18

|   |              |              |              |
|---|--------------|--------------|--------------|
| C | 0.382753981  | 2.185682006  | 0.053548829  |
| C | 1.594070060  | 1.452873626  | -0.212257858 |
| C | 1.513432089  | 0.121163160  | -0.410782702 |
| C | 0.237112556  | -0.574631611 | -0.247309912 |
| C | -0.970985519 | 0.158741140  | 0.009005643  |
| C | -0.837500415 | 1.586073054  | 0.152497623  |
| H | 0.438428425  | 3.254762176  | 0.156580661  |
| H | 2.531065694  | 1.957024803  | -0.330671327 |
| H | 0.240474375  | -1.639897958 | -0.393453242 |
| H | -1.699593824 | 2.187824719  | 0.328125719  |
| O | 2.504127132  | -0.616284825 | -0.862462262 |
| N | 3.293821352  | -1.222557426 | 0.979050964  |

|   |              |              |              |
|---|--------------|--------------|--------------|
| H | 4.046963060  | -1.746639661 | 0.583006302  |
| H | 3.671134832  | -0.468785086 | 1.517081422  |
| H | 2.759451286  | -1.819432400 | 1.576712411  |
| N | -2.128885185 | -0.454569249 | 0.072846087  |
| C | -3.365552614 | 0.321243829  | 0.224541260  |
| H | -4.198977316 | -0.357180390 | 0.288201161  |
| H | -3.338525706 | 0.909842586  | 1.131711768  |
| H | -3.513113155 | 0.971574250  | -0.629367780 |
| C | -2.249213249 | -1.902005292 | -0.161337262 |
| H | -1.647704407 | -2.458865120 | 0.544693028  |
| H | -3.278013615 | -2.187156278 | -0.020817821 |
| H | -1.958350143 | -2.153814450 | -1.174197579 |

### 3 Cl ( $1\pi\sigma^*/S_0$ )

|   |              |              |              |
|---|--------------|--------------|--------------|
| C | 0.377507155  | 2.187816289  | 0.050015837  |
| C | 1.590839205  | 1.454239825  | -0.227987035 |
| C | 1.498421817  | 0.124928725  | -0.424847083 |
| C | 0.236160653  | -0.567791535 | -0.267381509 |
| C | -0.973940212 | 0.158945902  | -0.005419424 |
| C | -0.840626895 | 1.590315796  | 0.147449090  |
| H | 0.434736027  | 3.255490398  | 0.163481823  |
| H | 2.529410110  | 1.957090976  | -0.342746245 |
| H | 0.244349882  | -1.631779771 | -0.416174300 |
| H | -1.701865000 | 2.190827546  | 0.331316623  |
| O | 2.479947933  | -0.618145894 | -0.894681928 |
| N | 3.304650927  | -1.232850452 | 1.018995326  |
| H | 4.055135626  | -1.750196187 | 0.606929241  |
| H | 3.697398920  | -0.486941245 | 1.558719633  |
| H | 2.803608096  | -1.840344860 | 1.636106636  |
| N | -2.131826796 | -0.451736442 | 0.062896967  |
| C | -3.370301313 | 0.320838397  | 0.237000255  |
| H | -4.200241727 | -0.361168768 | 0.307134381  |
| H | -3.332072627 | 0.902641992  | 1.148048708  |
| H | -3.531120110 | 0.976019487  | -0.610552327 |
| C | -2.253840644 | -1.900759804 | -0.167801852 |
| H | -1.642742751 | -2.454232803 | 0.532524126  |

|   |              |              |              |
|---|--------------|--------------|--------------|
| H | -3.280561985 | -2.187335283 | -0.015866538 |
| H | -1.972442625 | -2.152202999 | -1.183284975 |

### 3 Path-S<sub>0</sub>-23

|   |              |              |              |
|---|--------------|--------------|--------------|
| C | 0.432833446  | 2.219576412  | 0.126596414  |
| C | 1.543172459  | 1.564279159  | -0.208433941 |
| C | 1.433113195  | 0.114551550  | -0.509767362 |
| C | 0.222781700  | -0.587212261 | -0.362627991 |
| C | -0.960669182 | 0.101430908  | -0.013011142 |
| C | -0.809851608 | 1.508586212  | 0.217844047  |
| H | 0.443745896  | 3.275854996  | 0.316555644  |
| H | 2.495217041  | 2.046032051  | -0.315954288 |
| H | 0.232747809  | -1.634937170 | -0.572224262 |
| H | -1.686057227 | 2.072040213  | 0.470804172  |
| O | 2.419877970  | -0.455540893 | -0.987749293 |
| N | 3.421207751  | -1.267540101 | 0.992632647  |
| H | 4.145889339  | -1.720941814 | 0.479454757  |
| H | 3.825595342  | -0.529072353 | 1.527324209  |
| H | 3.005942398  | -1.929784652 | 1.619275275  |
| N | -2.148369078 | -0.484181311 | 0.083322565  |
| C | -3.364631665 | 0.282564386  | 0.369363612  |
| H | -4.193942930 | -0.400668227 | 0.436304700  |
| H | -3.285287956 | 0.799944039  | 1.317478177  |
| H | -3.574746884 | 0.995937010  | -0.419735287 |
| C | -2.280436638 | -1.910845811 | -0.221210452 |
| H | -1.636606058 | -2.501210640 | 0.418514803  |
| H | -3.297720859 | -2.212919685 | -0.040486643 |
| H | -2.041540638 | -2.111480143 | -1.259522531 |

### 3 Path-S<sub>0</sub>-25

|   |              |              |              |
|---|--------------|--------------|--------------|
| C | 0.377321999  | 2.237510415  | 0.175984318  |
| C | 1.513748378  | 1.627642202  | -0.231917134 |
| C | 1.452533593  | 0.180706102  | -0.623960970 |
| C | 0.182598963  | -0.538854128 | -0.479031418 |
| C | -0.994349525 | 0.106716861  | -0.040370022 |
| C | -0.852503892 | 1.486627118  | 0.261714615  |

|   |              |              |              |
|---|--------------|--------------|--------------|
| H | 0.339045881  | 3.274008278  | 0.449423878  |
| H | 2.466240279  | 2.116145380  | -0.309072800 |
| H | 0.204640211  | -1.574297643 | -0.749814935 |
| H | -1.720085568 | 2.031786626  | 0.580386911  |
| O | 2.421543461  | -0.387469064 | -1.084259031 |
| N | 3.563130412  | -1.333353113 | 1.121553497  |
| H | 4.239796388  | -1.777500183 | 0.532249128  |
| H | 4.032066086  | -0.613323300 | 1.632323627  |
| H | 3.234940910  | -2.014394697 | 1.777690295  |
| N | -2.170244197 | -0.515618350 | 0.078769825  |
| C | -3.366885272 | 0.214830033  | 0.489903643  |
| H | -4.189752328 | -0.477405233 | 0.551178232  |
| H | -3.237963962 | 0.659377924  | 1.470337989  |
| H | -3.628736453 | 0.985929712  | -0.226967298 |
| C | -2.289647211 | -1.929273319 | -0.276990233 |
| H | -1.618557970 | -2.538167834 | 0.317253714  |
| H | -3.296247190 | -2.255358648 | -0.074926457 |
| H | -2.084839619 | -2.089679358 | -1.330250076 |

### 3 oxenium ion

|   |              |              |              |
|---|--------------|--------------|--------------|
| C | 1.053120337  | 1.976950067  | 0.196522929  |
| C | 2.049928494  | 1.187742145  | -0.270333626 |
| C | 1.700957287  | -0.158246964 | -0.762280970 |
| C | 0.291521798  | -0.603516492 | -0.693798132 |
| C | -0.734086639 | 0.227114037  | -0.186739269 |
| C | -0.309100168 | 1.518674214  | 0.235237291  |
| H | 1.247286662  | 2.970656478  | 0.552919903  |
| H | 3.075868192  | 1.496552970  | -0.322722644 |
| H | 0.103385353  | -1.595302096 | -1.050208195 |
| H | -1.039251141 | 2.202904540  | 0.619482886  |
| O | 2.524654828  | -0.908210561 | -1.241726824 |
| N | 1.561109980  | -1.378192953 | 2.048844194  |
| H | 2.182852485  | -2.102864656 | 1.740303218  |
| H | 2.102062793  | -0.783819717 | 2.649082682  |
| H | 0.880503036  | -1.822135278 | 2.636966777  |
| N | -2.003158110 | -0.160349777 | -0.118919065 |

|   |              |              |              |
|---|--------------|--------------|--------------|
| C | -3.037743575 | 0.737334036  | 0.396834174  |
| H | -3.985347963 | 0.226799303  | 0.367720275  |
| H | -2.838469271 | 1.015008198  | 1.425593777  |
| H | -3.120632656 | 1.631219816  | -0.211050285 |
| C | -2.385300280 | -1.499637618 | -0.571024295 |
| H | -1.874178861 | -2.263569208 | 0.003152098  |
| H | -3.445234060 | -1.625839925 | -0.428858774 |
| H | -2.167529761 | -1.632607383 | -1.624551664 |

**Cartesian coordinates for 1 to produce HBD**

**1 Path-S<sub>NE</sub>(1nσ\*)-21**

|   |              |              |              |
|---|--------------|--------------|--------------|
| C | 2.325318489  | 0.077425488  | 0.275098665  |
| C | 1.676652530  | -1.186540516 | 0.146754928  |
| C | 0.322198479  | -1.258493726 | -0.155992293 |
| C | -0.381101937 | -0.073890950 | -0.361518287 |
| C | 0.196851568  | 1.196671583  | -0.267120235 |
| C | 1.587798135  | 1.273869992  | 0.069306001  |
| H | 3.372911887  | 0.117971727  | 0.513556868  |
| H | 2.229102788  | -2.100831419 | 0.278903923  |
| H | -0.183414195 | -2.201101490 | -0.272164007 |
| H | -0.368336834 | 2.068821926  | -0.549537672 |
| H | 2.065855507  | 2.236318385  | 0.135684049  |
| O | -1.656610852 | -0.212278040 | -0.743212417 |
| N | -2.743690747 | 0.130471264  | 0.715482804  |
| H | -2.508819844 | -0.636992690 | 1.314824951  |
| H | -3.633273354 | 0.084985102  | 0.259020788  |
| H | -2.431421988 | 1.034130044  | 1.012617544  |

**1 Path-S<sub>NE</sub>(1nσ\*)-24**

|   |              |              |              |
|---|--------------|--------------|--------------|
| C | 2.304007648  | 0.078344809  | 0.270424630  |
| C | 1.677155741  | -1.170839970 | 0.151355704  |
| C | 0.341699276  | -1.256842989 | -0.158323475 |
| C | -0.352403694 | -0.071379899 | -0.374933849 |
| C | 0.214219719  | 1.189236140  | -0.262716907 |
| C | 1.578240453  | 1.252913483  | 0.067297602  |
| H | 3.349084300  | 0.127032590  | 0.507086241  |

|   |              |              |              |
|---|--------------|--------------|--------------|
| H | 2.242749238  | -2.072718581 | 0.294765096  |
| H | -0.150947191 | -2.203954423 | -0.282381252 |
| H | -0.344073338 | 2.074235103  | -0.508409243 |
| H | 2.061126451  | 2.209808885  | 0.136981709  |
| O | -1.632802834 | -0.226022029 | -0.795740139 |
| N | -2.804112608 | 0.150932260  | 0.784511648  |
| H | -2.494606852 | -0.647723684 | 1.306894865  |
| H | -3.655697208 | 0.090541327  | 0.258279536  |
| H | -2.422152390 | 1.049680759  | 1.013288874  |

### 1 Path-S<sub>NE</sub>(1nσ\*)-27

|   |              |              |              |
|---|--------------|--------------|--------------|
| C | 2.305819016  | 0.081225713  | 0.275305867  |
| C | 1.693594219  | -1.166347986 | 0.164996198  |
| C | 0.367453952  | -1.260750497 | -0.173455198 |
| C | -0.329652690 | -0.082812554 | -0.413569334 |
| C | 0.222845087  | 1.178701025  | -0.267702927 |
| C | 1.577575134  | 1.246499791  | 0.071471978  |
| H | 3.348868602  | 0.140619665  | 0.516559340  |
| H | 2.265572795  | -2.060901688 | 0.327775320  |
| H | -0.112879008 | -2.212118569 | -0.309436660 |
| H | -0.337752369 | 2.066709821  | -0.496417524 |
| H | 2.057127390  | 2.203999276  | 0.153613665  |
| O | -1.609688679 | -0.236090290 | -0.863020083 |
| N | -2.892126622 | 0.180462818  | 0.883117632  |
| H | -2.520455356 | -0.642296935 | 1.325228967  |
| H | -3.708338194 | 0.113515968  | 0.299135317  |
| H | -2.443815843 | 1.067099570  | 1.038108187  |

### 1 Path-S<sub>NE</sub>(1nσ\*)-30

|   |              |              |              |
|---|--------------|--------------|--------------|
| C | 2.317540504  | 0.090527955  | 0.309453359  |
| C | 1.721321705  | -1.161642372 | 0.175272926  |
| C | 0.407144061  | -1.273757404 | -0.214932463 |
| C | -0.305485172 | -0.106572919 | -0.473671933 |
| C | 0.237908369  | 1.156742593  | -0.305860069 |
| C | 1.578340647  | 1.244132855  | 0.081140428  |
| H | 3.349894132  | 0.163509570  | 0.590008158  |

|   |              |              |              |
|---|--------------|--------------|--------------|
| H | 2.294943910  | -2.050958040 | 0.360570597  |
| H | -0.051735806 | -2.234609147 | -0.361092171 |
| H | -0.326764155 | 2.040250064  | -0.541912191 |
| H | 2.037068905  | 2.209617640  | 0.183979120  |
| O | -1.598464269 | -0.236623778 | -0.914273318 |
| N | -2.994195404 | 0.215427020  | 0.994636556  |
| H | -2.610402788 | -0.626279528 | 1.392297193  |
| H | -3.801697946 | 0.162360782  | 0.394692308  |
| H | -2.512776455 | 1.090805647  | 1.124757813  |

**1 Cl ( $1\sigma^*/3\sigma^*$ )**

|   |              |              |              |
|---|--------------|--------------|--------------|
| C | 2.317898402  | 0.098856441  | 0.351893051  |
| C | 1.744948956  | -1.158053397 | 0.172666019  |
| C | 0.446118493  | -1.284127913 | -0.265655937 |
| C | -0.280387893 | -0.124521066 | -0.524836806 |
| C | 0.256377531  | 1.141705863  | -0.354918819 |
| C | 1.578501231  | 1.244372287  | 0.085696835  |
| H | 3.333637934  | 0.182549688  | 0.685830961  |
| H | 2.323524372  | -2.041436342 | 0.370791038  |
| H | 0.005274709  | -2.250406453 | -0.427987126 |
| H | -0.312003932 | 2.019379372  | -0.603123208 |
| H | 2.022482335  | 2.214701388  | 0.208211796  |
| O | -1.588137576 | -0.246922969 | -0.927875920 |
| N | -3.085410247 | 0.245687056  | 1.080554658  |
| H | -2.730721370 | -0.622711482 | 1.448932425  |
| H | -3.890339163 | 0.242463562  | 0.473761847  |
| H | -2.567523900 | 1.094993582  | 1.233718541  |

**1 Path- $T_{\Sigma\Sigma}(3\sigma^*)$ -37**

|   |              |              |              |
|---|--------------|--------------|--------------|
| C | 2.291620873  | 0.245813728  | 0.458570632  |
| C | 1.765774366  | -1.091617844 | 0.360197623  |
| C | 0.539016321  | -1.324894612 | -0.127758940 |
| C | -0.307923632 | -0.212240919 | -0.538554169 |
| C | 0.258175033  | 1.128675063  | -0.487682916 |
| C | 1.527417873  | 1.335725399  | 0.018029587  |
| H | 3.278105306  | 0.398067156  | 0.852867987  |

|   |              |              |              |
|---|--------------|--------------|--------------|
| H | 2.382281234  | -1.910587075 | 0.684655716  |
| H | 0.137446673  | -2.317246879 | -0.217163394 |
| H | -0.341430008 | 1.939470321  | -0.862356881 |
| H | 1.934173373  | 2.328588466  | 0.065725868  |
| O | -1.489530348 | -0.384575237 | -0.868050093 |
| N | -3.180222977 | 0.213529698  | 0.830470121  |
| H | -2.893350953 | -0.620555598 | 1.314933665  |
| H | -3.705858655 | 0.128299431  | -0.025296636 |
| H | -2.797473656 | 1.105708099  | 1.093927867  |

### 1 Cl ( $^3\sigma\sigma^*/S_0$ )

|   |              |              |              |
|---|--------------|--------------|--------------|
| C | 2.343365454  | 0.238886475  | 0.403534647  |
| C | 1.808376797  | -1.096384763 | 0.322838382  |
| C | 0.566908846  | -1.324060549 | -0.128162295 |
| C | -0.281357077 | -0.206298364 | -0.506353078 |
| C | 0.284049038  | 1.133960004  | -0.468427632 |
| C | 1.570682119  | 1.334080213  | -0.009917104 |
| H | 3.342481010  | 0.386060130  | 0.766859708  |
| H | 2.429629215  | -1.917204326 | 0.632505134  |
| H | 0.151059789  | -2.311668219 | -0.200736420 |
| H | -0.327558283 | 1.948609757  | -0.811083130 |
| H | 1.982685168  | 2.324967459  | 0.027592360  |
| O | -1.469673115 | -0.385035780 | -0.808673040 |
| N | -3.356887257 | 0.218904477  | 0.821126703  |
| H | -3.634463325 | -0.625072057 | 1.295953130  |
| H | -2.708599856 | 0.149126806  | -0.000508852 |
| H | -3.662968976 | 1.097931506  | 1.203185040  |

### 1 Path-S<sub>0</sub>-43

|   |              |              |              |
|---|--------------|--------------|--------------|
| C | 2.420076999  | 0.235511001  | 0.324935998  |
| C | 1.890839001  | -1.102245999 | 0.239269001  |
| C | 0.627367998  | -1.329181000 | -0.145835000 |
| C | -0.253625998 | -0.207562002 | -0.426662000 |
| C | 0.310487999  | 1.133699998  | -0.414084002 |
| C | 1.620527002  | 1.333564001  | -0.027668001 |
| H | 3.434961999  | 0.381124001  | 0.640928001  |



|   |              |              |              |
|---|--------------|--------------|--------------|
| H | 2.533793999  | -1.926077999 | 0.491475000  |
| H | 0.211590999  | -2.316730000 | -0.217257000 |
| H | -0.328826001 | 1.949624000  | -0.699288002 |
| H | 2.027907000  | 2.326589001  | 0.003607999  |
| O | -1.463007000 | -0.388206002 | -0.622455000 |
| N | -3.583497000 | 0.237544000  | 0.707910998  |
| H | -4.070232000 | -0.571335001 | 1.056626999  |
| H | -2.758734997 | 0.118148002  | 0.062093002  |
| H | -3.893408999 | 1.141204002  | 1.025977000  |

### 1 HBD

|   |              |              |              |
|---|--------------|--------------|--------------|
| C | 2.540433782  | 0.239446133  | -0.028162930 |
| C | 2.019936564  | -1.103994909 | -0.048742194 |
| C | 0.702028949  | -1.340745058 | -0.090856040 |
| C | -0.236128673 | -0.229562695 | -0.101645800 |
| C | 0.299626662  | 1.122965527  | -0.098556511 |
| C | 1.663556055  | 1.333399231  | -0.059865081 |
| H | 3.601771734  | 0.394974327  | 0.005548561  |
| H | 2.714647854  | -1.923911875 | -0.029619395 |
| H | 0.294792284  | -2.334090380 | -0.106628872 |
| H | -0.393747609 | 1.943554527  | -0.125813822 |
| H | 2.054122742  | 2.333844249  | -0.053760233 |
| O | -1.456140957 | -0.440712090 | -0.105640242 |
| N | -3.878801627 | 0.315798361  | 0.241381371  |
| H | -4.532081938 | -0.448504347 | 0.186794738  |
| H | -2.842387120 | 0.144123445  | 0.076236487  |
| H | -4.251391270 | 1.222414072  | 0.468394638  |

### Cartesian coordinates for 2 to produce HBD

#### 2 CI ( $1\pi\sigma^*/1n\sigma^*$ )

|   |              |              |              |
|---|--------------|--------------|--------------|
| C | -0.535240498 | -1.034604145 | -0.637266137 |
| C | -1.915724455 | -0.962178909 | -0.793009552 |
| C | -2.614913860 | 0.203615769  | -0.383950131 |
| C | -1.872600674 | 1.249007049  | 0.261743895  |
| C | -0.529083907 | 1.188024853  | 0.357205153  |
| C | 0.193559814  | 0.047083540  | -0.095554986 |

|   |              |              |              |
|---|--------------|--------------|--------------|
| H | -0.007389442 | -1.896894154 | -0.994589915 |
| H | -2.462238165 | -1.740991371 | -1.287671829 |
| H | -2.417130980 | 2.110374136  | 0.596242951  |
| O | -3.850820581 | 0.375627247  | -0.669170476 |
| N | -4.797384158 | -0.554777241 | 1.087230129  |
| H | -5.668747249 | -0.339570151 | 0.632207795  |
| H | -4.481761404 | -1.507972461 | 1.063088481  |
| H | -4.526313847 | 0.013236258  | 1.870466063  |
| C | 1.653720920  | 0.001761282  | -0.011814919 |
| C | 2.308228635  | -1.185033583 | 0.391999102  |
| C | 2.432624866  | 1.137687846  | -0.324501009 |
| C | 3.691567456  | -1.224751056 | 0.497747237  |
| H | 1.728024565  | -2.048881406 | 0.659500191  |
| C | 3.801292724  | 1.078538731  | -0.258931820 |
| H | 1.951791499  | 2.039308891  | -0.658045747 |
| C | 4.442854753  | -0.095924336 | 0.161996005  |
| H | 4.179831165  | -2.121080238 | 0.832837776  |
| H | 4.387059680  | 1.937590223  | -0.530753377 |
| H | 5.514926218  | -0.125734959 | 0.225072864  |
| H | 0.010907116  | 1.999808683  | 0.804465229  |

## 2 STC( $1\sigma^*/3\sigma^*$ )

|   |              |              |              |
|---|--------------|--------------|--------------|
| C | -0.542134000 | -1.033294997 | -0.635844999 |
| C | -1.910363001 | -0.965018998 | -0.793361000 |
| C | -2.582720003 | 0.211950998  | -0.391663000 |
| C | -1.885511001 | 1.253552999  | 0.257448002  |
| C | -0.519053998 | 1.183600000  | 0.357941000  |
| C | 0.188122999  | 0.047612998  | -0.095104000 |
| H | -0.014846999 | -1.898653001 | -0.992869999 |
| H | -2.446441001 | -1.749998000 | -1.298097002 |
| H | -2.410325998 | 2.128757002  | 0.592584997  |
| O | -3.828530001 | 0.384844001  | -0.688419997 |
| N | -4.819041001 | -0.572464001 | 1.119547999  |
| H | -5.647745998 | -0.322625002 | 0.603321998  |
| H | -4.461647001 | -1.514015999 | 1.057273003  |
| H | -4.505447002 | 0.024374999  | 1.870305997  |

|   |             |              |              |
|---|-------------|--------------|--------------|
| C | 1.659117999 | -0.000297001 | -0.009971001 |
| C | 2.305731998 | -1.181127001 | 0.390104002  |
| C | 2.430315002 | 1.132634997  | -0.322644999 |
| C | 3.692408001 | -1.220866001 | 0.495477998  |
| H | 1.727786002 | -2.047724000 | 0.657424001  |
| C | 3.803302999 | 1.074898997  | -0.256743000 |
| H | 1.950779998 | 2.035927999  | -0.655506998 |
| C | 4.441279001 | -0.094439999 | 0.161474998  |
| H | 4.180665000 | -2.118297999 | 0.829334999  |
| H | 4.387546999 | 1.935951001  | -0.527391001 |
| H | 5.513228999 | -0.124586999 | 0.224730999  |
| H | 0.014218998 | 1.998132001  | 0.810474000  |

**2 STC( $^3\sigma\sigma^*/S_0(\bullet\text{NH}_3^+)$ )**

|   |              |              |              |
|---|--------------|--------------|--------------|
| C | -0.503668260 | -0.978498778 | -0.729590987 |
| C | -1.843464339 | -0.929623597 | -0.863419707 |
| C | -2.574923412 | 0.239537691  | -0.436667784 |
| C | -1.814789774 | 1.375969022  | 0.045926018  |
| C | -0.454632563 | 1.299122754  | 0.169619729  |
| C | 0.250903455  | 0.118020439  | -0.196933821 |
| H | 0.029491916  | -1.851122931 | -1.058316434 |
| H | -2.393635769 | -1.750528458 | -1.284136914 |
| H | -2.365568668 | 2.252989690  | 0.332393248  |
| O | -3.818018344 | 0.271689845  | -0.435390313 |
| N | -5.328059814 | -0.754374708 | 1.354559410  |
| H | -4.765027207 | -0.406786309 | 0.523759850  |
| H | -5.528790662 | -1.729903399 | 1.497994025  |
| H | -5.676675648 | -0.104542728 | 2.039532574  |
| C | 1.710235383  | 0.024657686  | -0.048591172 |
| C | 2.317126111  | -1.179209125 | 0.335591781  |
| C | 2.524562984  | 1.142365461  | -0.288969778 |
| C | 3.698683482  | -1.257340268 | 0.483104538  |
| H | 1.714850819  | -2.044616433 | 0.546012949  |
| C | 3.890211689  | 1.056570536  | -0.160719947 |
| H | 2.085848315  | 2.069539739  | -0.610350578 |

|   |             |              |              |
|---|-------------|--------------|--------------|
| C | 4.489065791 | -0.139916920 | 0.230216625  |
| H | 4.150378821 | -2.182317836 | 0.791927729  |
| H | 4.497617592 | 1.919750060  | -0.365767325 |
| H | 5.556894313 | -0.198808707 | 0.335774183  |
| H | 0.087384097 | 2.130873007  | 0.579190124  |

## 2 Path- $T_{\Sigma}(3\sigma^*)$ -22

|   |              |              |              |
|---|--------------|--------------|--------------|
| C | -0.509312057 | -0.978312137 | -0.732947797 |
| C | -1.848992505 | -0.929440380 | -0.872395638 |
| C | -2.585665176 | 0.236185771  | -0.442028831 |
| C | -1.828441240 | 1.361611316  | 0.072234631  |
| C | -0.467112436 | 1.287241751  | 0.193564116  |
| C | 0.242591213  | 0.114333946  | -0.187494770 |
| H | 0.024951432  | -1.848958003 | -1.066316472 |
| H | -2.401463258 | -1.740210390 | -1.311936670 |
| H | -2.374340427 | 2.237501334  | 0.371496822  |
| O | -3.827289456 | 0.277917541  | -0.476583079 |
| N | -5.262334159 | -0.735135447 | 1.351649851  |
| H | -4.897831070 | -0.390456809 | 0.428700470  |
| H | -5.289971324 | -1.715848715 | 1.574473552  |
| H | -5.440705564 | -0.079147459 | 2.092410833  |
| C | 1.704016005  | 0.023073250  | -0.042202087 |
| C | 2.312764484  | -1.177966506 | 0.347577646  |
| C | 2.516872742  | 1.139357935  | -0.292503243 |
| C | 3.695009426  | -1.254359296 | 0.489740494  |
| H | 1.712527922  | -2.042323958 | 0.568762089  |
| C | 3.883419440  | 1.054876724  | -0.169262809 |
| H | 2.073377507  | 2.063236471  | -0.618284194 |
| C | 4.484247611  | -0.138761297 | 0.226352637  |
| H | 4.146876657  | -2.177438033 | 0.804500493  |
| H | 4.489549226  | 1.915808081  | -0.385266247 |
| H | 5.552759852  | -0.196796293 | 0.325611990  |
| H | 0.073352291  | 2.114550762  | 0.612449703  |

## 2 Path-S<sub>0</sub>-25

|   |              |              |              |
|---|--------------|--------------|--------------|
| C | -0.504907000 | -0.867214998 | -0.817585999 |
| C | -1.836225998 | -0.762566001 | -0.924024002 |
| C | -2.518884002 | 0.400288002  | -0.391175998 |
| C | -1.711886998 | 1.493801999  | 0.115703002  |
| C | -0.354613999 | 1.357689001  | 0.212909000  |
| C | 0.298513998  | 0.167995001  | -0.210782998 |
| H | -0.010302002 | -1.733929998 | -1.216283998 |
| H | -2.431793000 | -1.520121000 | -1.398442000 |
| H | -2.229144000 | 2.370045000  | 0.459755999  |
| O | -3.754906999 | 0.463491001  | -0.321702000 |
| N | -5.575627998 | -0.870955001 | 0.978804002  |
| H | -4.889543000 | -0.400751000 | 0.325426000  |
| H | -6.401371999 | -1.346046001 | 0.652686002  |
| H | -5.412335001 | -0.852873999 | 1.972306002  |
| C | 1.740572998  | -0.005344002 | -0.035528998 |
| C | 2.291900998  | -1.279094998 | 0.164750002  |
| C | 2.601754000  | 1.104383002  | -0.046410998 |
| C | 3.661256998  | -1.433514000 | 0.352338002  |
| H | 1.658171999  | -2.145970000 | 0.208495000  |
| C | 3.953699999  | 0.946621997  | 0.125216000  |
| H | 2.210475998  | 2.088680001  | -0.225600999 |
| C | 4.496995999  | -0.321791997 | 0.329237002  |
| H | 4.068714002  | -2.414018999 | 0.518283998  |
| H | 4.596834998  | 1.807252999  | 0.094048000  |
| H | 5.556185999  | -0.438478999 | 0.465710000  |
| H | 0.222928003  | 2.145150998  | 0.661108001  |

## 2 HBD

|   |              |              |              |
|---|--------------|--------------|--------------|
| C | -0.505557618 | -0.859957899 | -0.813494670 |
| C | -1.842026802 | -0.767890810 | -0.904536917 |
| C | -2.529082475 | 0.392414897  | -0.373094932 |
| C | -1.715506444 | 1.492804643  | 0.111176584  |
| C | -0.356401777 | 1.362931084  | 0.204061209  |
| C | 0.305025334  | 0.175842261  | -0.216223681 |

|   |              |              |              |
|---|--------------|--------------|--------------|
| H | -0.009268391 | -1.723488103 | -1.215710444 |
| H | -2.428307425 | -1.540230016 | -1.368596482 |
| H | -2.224664991 | 2.374462063  | 0.452705331  |
| O | -3.763896974 | 0.452906869  | -0.286581199 |
| N | -5.577805176 | -0.863320159 | 0.938082876  |
| H | -4.845986029 | -0.405886327 | 0.313291373  |
| H | -6.406941786 | -1.294914715 | 0.565829965  |
| H | -5.475149658 | -0.844689611 | 1.939528578  |
| C | 1.752096352  | -0.002194138 | -0.043582350 |
| C | 2.302837425  | -1.278099976 | 0.160713432  |
| C | 2.619147548  | 1.104466543  | -0.055596425 |
| C | 3.672765725  | -1.435155814 | 0.352107059  |
| H | 1.667825637  | -2.144906529 | 0.204838930  |
| C | 3.970904483  | 0.942679294  | 0.124210876  |
| H | 2.232518209  | 2.090343269  | -0.239700408 |
| C | 4.511692855  | -0.325725837 | 0.332818628  |
| H | 4.076913614  | -2.416479943 | 0.519691249  |
| H | 4.615454099  | 1.801692066  | 0.095890331  |
| H | 5.570308957  | -0.444050659 | 0.475670412  |
| H | 0.215166348  | 2.157233369  | 0.643196414  |

### **Cartesian coordinates for reaction of 1**

**(a)**

**IM(stepwise)**

|   |              |              |              |
|---|--------------|--------------|--------------|
| C | -1.662079121 | -1.038210075 | 0.038010003  |
| C | -1.962989144 | 0.403117031  | 0.161247012  |
| C | -1.021940076 | 1.337978096  | 0.101122010  |
| C | 0.395608027  | 0.922111068  | -0.073221007 |
| C | 0.694084051  | -0.540319039 | -0.387919029 |
| C | -0.442487030 | -1.498359110 | -0.193135017 |
| H | -2.482504177 | -1.726003124 | 0.130599008  |
| H | -2.989463215 | 0.682476051  | 0.312987022  |
| H | -1.217355090 | 2.387579171  | 0.210626013  |
| H | 1.032661075  | -0.503784038 | -1.414320100 |
| H | -0.254298016 | -2.550905184 | -0.316804025 |

|   |             |              |              |
|---|-------------|--------------|--------------|
| O | 1.373546099 | 1.657013117  | -0.016754000 |
| N | 1.880948133 | -0.908858067 | 0.398701031  |
| H | 2.322465165 | -1.751713127 | 0.061112003  |
| H | 1.654650118 | -1.052970077 | 1.373388097  |
| H | 2.551946181 | -0.148814009 | 0.347191023  |

**TS(stepwise)/ts(concerted)**

|   |              |              |              |
|---|--------------|--------------|--------------|
| C | 1.578558113  | 0.472042034  | 0.885850065  |
| C | 1.496753110  | -0.972891071 | 0.565007041  |
| C | 0.538134040  | -1.492529106 | -0.237664017 |
| C | -0.413783032 | -0.525334036 | -0.780551058 |
| C | -0.537262040 | 0.834255061  | -0.187723015 |
| C | 0.632039045  | 1.369940100  | 0.529154039  |
| H | 2.454479177  | 0.807980056  | 1.409873101  |
| H | 2.269049162  | -1.606334113 | 0.960103068  |
| H | 0.507201036  | -2.521934179 | -0.538921037 |
| H | -1.021371073 | 1.142260081  | -1.103862080 |
| H | 0.713933051  | 2.416803175  | 0.753503052  |
| O | -1.073586077 | -0.515341037 | -1.792854128 |
| N | -1.894712134 | 0.776338056  | 0.947922070  |
| H | -1.659491121 | 0.226728014  | 1.758551129  |
| H | -2.705836196 | 0.381541030  | 0.497506038  |
| H | -2.114610152 | 1.713609121  | 1.244032089  |

**IM(concerted)**

|   |              |              |              |
|---|--------------|--------------|--------------|
| C | 1.638218117  | 0.461958033  | 0.862786060  |
| C | 1.540371111  | -0.975782072 | 0.566086039  |
| C | 0.577232041  | -1.468171104 | -0.243381015 |
| C | -0.380525026 | -0.529660039 | -0.841029059 |
| C | -0.357233024 | 0.894114062  | -0.375702025 |
| C | 0.727857054  | 1.373180099  | 0.428227031  |
| H | 2.483568178  | 0.796830058  | 1.436002101  |
| H | 2.278019166  | -1.625756119 | 0.997386072  |
| H | 0.500879035  | -2.505828183 | -0.506637034 |
| H | -0.943628066 | 1.507340110  | -1.027198076 |
| H | 0.816298061  | 2.420183173  | 0.646338044  |

|   |              |              |              |
|---|--------------|--------------|--------------|
| O | -1.185649085 | -0.776971058 | -1.707965123 |
| N | -2.025947144 | 0.745186053  | 1.004717071  |
| H | -1.820691132 | 0.144089012  | 1.782664127  |
| H | -2.834438206 | 0.388583030  | 0.525958036  |
| H | -2.244835159 | 1.657837120  | 1.361673097  |

**o-aminophenol**

|   |              |              |              |
|---|--------------|--------------|--------------|
| C | -1.838038134 | -1.042492077 | 0.228382015  |
| C | -2.000854147 | 0.308382021  | -0.056399002 |
| C | -0.913999067 | 1.142821083  | -0.243054016 |
| C | 0.365393027  | 0.620334047  | -0.142232012 |
| C | 0.515446036  | -0.726531052 | 0.139021012  |
| C | -0.565362040 | -1.567295115 | 0.327868026  |
| H | -2.692897193 | -1.676269120 | 0.365983028  |
| H | -2.990850215 | 0.717987051  | -0.136575012 |
| H | -1.055582075 | 2.185584156  | -0.463287035 |
| H | 1.337126188  | 2.227671524  | -0.552939315 |
| H | -0.420114030 | -2.611371188 | 0.546461041  |
| O | 1.532671111  | 1.327366097  | -0.298260019 |
| N | 1.892431136  | -1.233154089 | 0.241410015  |
| H | 1.997379145  | -2.130672153 | -0.208586013 |
| H | 2.192971158  | -1.328023097 | 1.202355084  |
| H | 2.525256179  | -0.581676040 | -0.206661015 |

**(b)**

**IM(stepwise)**

|   |              |              |              |
|---|--------------|--------------|--------------|
| C | 0.282939359  | 0.373464012  | 1.342117119  |
| C | 0.315085988  | -0.992746388 | 0.713945656  |
| C | 0.108930385  | -1.178049105 | -0.598931341 |
| C | -0.156059700 | -0.042332370 | -1.515978617 |
| C | -0.218791175 | 1.311008974  | -0.910419453 |
| C | -0.014058118 | 1.508386870  | 0.400767823  |
| H | -0.394734392 | 0.390258225  | 2.187878452  |
| H | 0.474251498  | -1.831272079 | 1.370987405  |
| H | 0.112431829  | -2.160631126 | -1.033469335 |
| H | -0.452155008 | 2.126677092  | -1.569691774 |



|   |              |              |              |
|---|--------------|--------------|--------------|
| H | -0.095615301 | 2.493221826  | 0.829276180  |
| O | -0.313322293 | -0.211144919 | -2.701873182 |
| N | 1.662535663  | 0.633271690  | 1.967386517  |
| H | 1.905471133  | -0.078435319 | 2.641800139  |
| H | 1.694371438  | 1.524957014  | 2.440943792  |
| H | 2.378357686  | 0.638237595  | 1.254004334  |

### TS(stepwise)

|   |              |              |              |
|---|--------------|--------------|--------------|
| C | 0.456183894  | 0.362751888  | 0.949373968  |
| C | 0.941899969  | -0.949751806 | 0.346878354  |
| C | 0.300097540  | -1.216400560 | -0.800182820 |
| C | -0.694470679 | -0.106247779 | -1.037619227 |
| C | -0.044742635 | 1.248351028  | -1.182268526 |
| C | 0.596928812  | 1.516723407  | -0.035562865 |
| H | -0.620347604 | 0.236763225  | 1.107504380  |
| H | 1.665038889  | -1.582641826 | 0.828237437  |
| H | 0.412873700  | -2.092612233 | -1.407002151 |
| H | -0.145412283 | 1.901061705  | -2.026377715 |
| H | 1.103853248  | 2.433355856  | 0.205306855  |
| O | -1.766572667 | -0.169837792 | -0.480212055 |
| N | 1.157115896  | 0.678423119  | 2.352601100  |
| H | 0.997898241  | -0.076446215 | 3.003246785  |
| H | 0.776437964  | 1.522429271  | 2.754174500  |
| H | 2.152856713  | 0.798950699  | 2.240645673  |

### TS(concerted)

|   |              |              |              |
|---|--------------|--------------|--------------|
| C | 0.014835939  | -0.016976509 | 0.773973353  |
| C | 0.939457530  | -0.908660277 | 0.141662501  |
| C | 0.820449229  | -0.980207390 | -1.201525985 |
| C | -0.275830111 | -0.163518479 | -1.790874439 |
| C | -0.592412660 | 1.148628940  | -1.163035071 |
| C | -0.457888792 | 1.196788198  | 0.179734994  |
| H | -0.477579266 | -0.359557557 | 1.646026058  |
| H | 1.513355400  | -1.592018117 | 0.737475744  |
| H | 1.280267734  | -1.746087655 | -1.797801772 |
| H | -1.129257793 | 1.884471025  | -1.732142803 |

|   |              |              |              |
|---|--------------|--------------|--------------|
| H | -0.854577182 | 1.975759170  | 0.801964840  |
| O | -1.090965221 | -0.691764091 | -2.495640161 |
| N | 1.733620604  | 1.082996960  | 2.973027446  |
| H | 2.111142469  | 0.367611894  | 3.566304486  |
| H | 1.238715790  | 1.715864824  | 3.573706099  |
| H | 2.516305310  | 1.591541074  | 2.605888457  |

### **IM(concerted)**

|   |              |              |              |
|---|--------------|--------------|--------------|
| C | 0.661627997  | 0.722484370  | 0.288359521  |
| C | 1.542331940  | 0.066059186  | -0.621770017 |
| C | 0.949559561  | -0.571834280 | -1.657172478 |
| C | -0.534729567 | -0.558276431 | -1.656601449 |
| C | -1.248076088 | 0.610829214  | -1.084237589 |
| C | -0.625181813 | 1.232383797  | -0.056608773 |
| H | 0.937999816  | 0.737256125  | 1.319750363  |
| H | 2.580571426  | -0.041067224 | -0.370436378 |
| H | 1.460250093  | -1.260060180 | -2.304862216 |
| H | -2.284153182 | 0.754965396  | -1.328641197 |
| H | -1.104914952 | 1.941891508  | 0.590739370  |
| O | -1.126960513 | -1.595185137 | -1.787605330 |
| N | 1.455277652  | 0.626758327  | 3.593046850  |
| H | 0.874244192  | -0.017623322 | 4.096348485  |
| H | 1.349179815  | 1.516660377  | 4.043529944  |
| H | 2.402612605  | 0.339630292  | 3.754904681  |

### **p-aminophenol**

|   |              |              |              |
|---|--------------|--------------|--------------|
| C | 1.082172020  | 0.470038114  | 1.120010199  |
| C | 0.697570218  | -0.828787454 | 0.837691004  |
| C | -0.218853973 | -1.045667770 | -0.193516559 |
| C | -0.729755667 | 0.034909162  | -0.910933479 |
| C | -0.324394073 | 1.342940667  | -0.602828906 |
| C | 0.584793444  | 1.567507743  | 0.418066241  |
| H | -1.844546485 | -0.994086101 | -2.078148956 |
| H | 1.088709105  | -1.666510150 | 1.388513751  |
| H | -0.523440020 | -2.049947783 | -0.426291645 |
| H | -0.728092897 | 2.158871929  | -1.170948129 |

|   |              |              |              |
|---|--------------|--------------|--------------|
| H | 0.896221892  | 2.570737022  | 0.652294157  |
| O | -1.604776041 | -0.096256590 | -1.911385784 |
| N | 2.046868728  | 0.716329731  | 2.218635080  |
| H | 2.420265291  | -0.149697253 | 2.579068796  |
| H | 1.615573209  | 1.203051952  | 2.992724175  |
| H | 2.831324246  | 1.271438777  | 1.905793762  |

**(c)**

**IM(stepwise)**

|   |              |              |              |
|---|--------------|--------------|--------------|
| C | 1.406963129  | 0.892050371  | -0.320882426 |
| C | 1.632888280  | -0.563863024 | -0.317671267 |
| C | 0.634672184  | -1.440754742 | -0.081401548 |
| C | -0.727733586 | -0.943563067 | 0.144745340  |
| C | -0.883005335 | 0.540136303  | 0.507514971  |
| C | 0.221646007  | 1.431224414  | 0.013989568  |
| H | 2.224793809  | 1.531612508  | -0.595906691 |
| H | 2.621761927  | -0.920823247 | -0.537002839 |
| H | 0.765766015  | -2.504985002 | -0.130645470 |
| H | -0.966404606 | 0.607807083  | 1.588582286  |
| H | 0.082528388  | 2.497089725  | 0.065278236  |
| O | -1.730150540 | -1.612146660 | 0.065344722  |
| N | -2.230678636 | 0.960093728  | -0.023198818 |
| H | -2.565710986 | 1.810554890  | 0.403604107  |
| H | -2.893075093 | 0.213385233  | 0.156411221  |
| H | -2.203103304 | 1.102475112  | -1.023111875 |

**TS(stepwise)**

|   |              |              |              |
|---|--------------|--------------|--------------|
| C | 1.353284939  | 0.823191187  | -0.226919317 |
| C | 1.363237319  | -0.605650955 | -0.623359777 |
| C | 0.385935577  | -1.475289977 | -0.269840788 |
| C | -0.642465986 | -0.874941066 | 0.569246889  |
| C | -0.906866826 | 0.599153225  | 0.620461764  |
| C | 0.304270293  | 1.426088442  | 0.378025457  |
| H | 2.245304941  | 1.387954738  | -0.426586788 |
| H | 2.217568772  | -0.956483618 | -1.172367827 |
| H | 0.411592482  | -2.527971901 | -0.474863676 |

|   |              |              |              |
|---|--------------|--------------|--------------|
| H | -1.378372910 | 0.135295208  | 1.569126751  |
| H | 0.328503595  | 2.464544917  | 0.654326615  |
| O | -1.249488902 | -1.258671270 | 1.553417743  |
| N | -2.063483517 | 1.033811035  | -0.396057187 |
| H | -2.338755199 | 1.983347413  | -0.194141543 |
| H | -2.880555669 | 0.450950871  | -0.287266420 |
| H | -1.758551234 | 0.994965361  | -1.357552378 |

### **TS(concerted)**

|   |              |              |              |
|---|--------------|--------------|--------------|
| C | 2.094476561  | 0.489205655  | -0.204045186 |
| C | 1.917563288  | -0.925389448 | -0.410729860 |
| C | 0.754611784  | -1.552499689 | -0.145260462 |
| C | -0.334555165 | -0.739821185 | 0.333086285  |
| C | -0.140913218 | 0.659890475  | 0.566634039  |
| C | 1.055946556  | 1.286915534  | 0.306727162  |
| H | 3.051605352  | 0.925937644  | -0.417424132 |
| H | 2.753099397  | -1.485717108 | -0.789317038 |
| H | 0.610147866  | -2.605393840 | -0.295729441 |
| H | -1.015295922 | 0.977668858  | 1.081598810  |
| H | 1.213967926  | 2.329651916  | 0.507529518  |
| O | -1.490752658 | -1.110207751 | 0.576907730  |
| N | -3.029388697 | 0.761634887  | -0.237330376 |
| H | -3.729389537 | 1.284552774  | 0.263090640  |
| H | -2.503358708 | -0.051022143 | 0.204733015  |
| H | -2.907527500 | 0.983592040  | -1.211406000 |

### **IM(concerted)**

|   |              |              |              |
|---|--------------|--------------|--------------|
| C | 2.191483387  | 0.408893937  | -0.019563683 |
| C | 2.304836837  | -1.016677265 | -0.132518742 |
| C | 1.178787953  | -1.776331929 | -0.165070884 |
| C | -0.129101431 | -1.095053660 | -0.081811776 |
| C | -0.181304905 | 0.367911345  | 0.032687342  |
| C | 0.964221671  | 1.102804419  | 0.062748214  |
| H | 3.104288212  | 0.981381783  | 0.003393952  |
| H | 3.284968047  | -1.450594492 | -0.188998983 |
| H | 1.198499218  | -2.847043377 | -0.248348926 |

|   |              |              |              |
|---|--------------|--------------|--------------|
| H | -1.200379544 | 0.716050760  | 0.083408807  |
| H | 0.962023670  | 2.173024166  | 0.145652651  |
| O | -1.193212346 | -1.676752762 | -0.102173459 |
| N | -3.415446255 | 1.405048820  | 0.189777011  |
| H | -3.676727315 | 1.858882664  | 1.044652326  |
| H | -3.968347605 | 0.571149223  | 0.125124389  |
| H | -3.710175969 | 2.005339564  | -0.557101768 |

**o-aminophenol**

|   |              |              |              |
|---|--------------|--------------|--------------|
| C | 1.534461302  | 0.929754684  | -0.524010114 |
| C | 1.625206648  | -0.424619450 | -0.186708180 |
| C | 0.505687171  | -1.138134863 | 0.236785139  |
| C | -0.724868943 | -0.489065513 | 0.327971195  |
| C | -0.796402801 | 0.856146150  | -0.012700042 |
| C | 0.309345875  | 1.584612340  | -0.438687839 |
| H | 2.404525898  | 1.467087841  | -0.849515427 |
| H | 2.571427466  | -0.927734212 | -0.254895431 |
| H | 0.583265249  | -2.180008533 | 0.490859270  |
| H | -1.790756094 | -1.975397498 | 0.944168076  |
| H | 0.220637178  | 2.625576708  | -0.695935203 |
| O | -1.885566485 | -1.064102326 | 0.711309459  |
| N | -2.123662322 | 1.491106222  | 0.092868009  |
| H | -2.123237001 | 2.262563899  | 0.744773347  |
| H | -2.789311748 | 0.802039274  | 0.424374610  |
| H | -2.450770396 | 1.834534843  | -0.798933956 |

**(d)**

**IM(stepwise)**

|   |              |              |              |
|---|--------------|--------------|--------------|
| C | 0.254592228  | 0.393497128  | 1.332912615  |
| C | 0.309476466  | -0.985675802 | 0.739064303  |
| C | 0.134752806  | -1.203181400 | -0.552192358 |
| C | -0.120612963 | -0.093454639 | -1.511195987 |
| C | -0.212640326 | 1.275177224  | -0.945616963 |
| C | -0.037781435 | 1.505182755  | 0.364484303  |
| H | -0.422225833 | 0.426326904  | 2.179074779  |
| H | 0.462177620  | -1.806397309 | 1.420160175  |

|   |              |              |              |
|---|--------------|--------------|--------------|
| H | 0.156383133  | -2.195889925 | -0.963925183 |
| H | -0.441188656 | 2.069659445  | -1.631715237 |
| H | -0.138366642 | 2.498237728  | 0.769060673  |
| O | -0.245982181 | -0.303078549 | -2.693264135 |
| N | 1.657064214  | 0.682942510  | 1.972634076  |
| H | 1.891685060  | -0.014955364 | 2.663532391  |
| H | 1.674604662  | 1.587643456  | 2.420857483  |
| H | 2.367700856  | 0.668837841  | 1.254872804  |

**TS(stepwise)**

|   |              |              |              |
|---|--------------|--------------|--------------|
| C | 0.431626630  | 0.360295098  | 0.948232490  |
| C | 0.897986364  | -0.955830301 | 0.357174788  |
| C | 0.299926203  | -1.214614317 | -0.787965276 |
| C | -0.676541259 | -0.114492207 | -1.120460021 |
| C | -0.045618984 | 1.252375410  | -1.182254016 |
| C | 0.560173060  | 1.522291521  | -0.018274792 |
| H | -0.624540334 | 0.254996329  | 1.197097835  |
| H | 1.586959003  | -1.606323604 | 0.864898223  |
| H | 0.421558059  | -2.104028893 | -1.375545077 |
| H | -0.166500631 | 1.931751477  | -2.002946736 |
| H | 1.000649751  | 2.462933789  | 0.257118531  |
| O | -1.837108460 | -0.231202557 | -0.816180478 |
| N | 1.241147867  | 0.688176708  | 2.406714385  |
| H | 1.095249397  | -0.073901143 | 3.050497408  |
| H | 0.876737601  | 1.536673559  | 2.811224062  |
| H | 2.227934751  | 0.795771117  | 2.229412420  |

**TS(concerted)**

|   |              |              |              |
|---|--------------|--------------|--------------|
| C | 1.004147364  | 0.376284157  | -0.086184754 |
| C | 1.940377320  | -0.602812104 | 0.379233748  |
| C | 1.805031899  | -1.805830248 | -0.224111116 |
| C | 0.769604286  | -1.815981063 | -1.297816242 |
| C | -0.512112997 | -1.098591469 | -1.044251263 |
| C | -0.349760613 | 0.102394946  | -0.435709714 |
| H | 1.383129261  | 1.332937884  | -0.347168867 |
| H | 2.788822762  | -0.309014981 | 0.968586928  |

|   |              |              |              |
|---|--------------|--------------|--------------|
| H | 2.548395354  | -2.580182905 | -0.184821414 |
| H | -1.396600838 | -1.372725398 | -1.588712283 |
| H | -1.065642565 | 0.911732373  | -0.415443358 |
| O | 1.134864733  | -1.952978661 | -2.433102533 |
| N | -1.878619928 | 2.994258117  | -0.300347280 |
| H | -1.312086967 | 3.808038696  | -0.148114373 |
| H | -2.570341414 | 2.993915078  | 0.426436380  |
| H | -2.372987760 | 3.153700095  | -1.158760653 |

### **IM(concerted)**

|   |              |              |              |
|---|--------------|--------------|--------------|
| C | 2.016790526  | 0.330377702  | 0.641563707  |
| C | 2.378612453  | -0.974151481 | 0.197843482  |
| C | 1.472841564  | -1.648876958 | -0.542630877 |
| C | 0.202596436  | -0.971975118 | -0.874192423 |
| C | -0.183299855 | 0.297572121  | -0.219394755 |
| C | 0.746884294  | 0.928295907  | 0.541048049  |
| H | 2.788975593  | 0.918010257  | 1.052835645  |
| H | 3.360963202  | -1.347810945 | 0.414419659  |
| H | 1.654635661  | -2.611498619 | -0.982684702 |
| H | -1.140770050 | 0.730930303  | -0.480772856 |
| H | 0.575993232  | 1.888538456  | 0.989045233  |
| O | -0.474323804 | -1.395773861 | -1.776875087 |
| N | -2.668003663 | 1.875714104  | -1.554940133 |
| H | -2.352731818 | 2.723367748  | -1.988480511 |
| H | -3.476708581 | 2.115010993  | -1.012573231 |
| H | -2.986235292 | 1.277413881  | -2.294497983 |

### **p-aminophenol**

|   |              |              |              |
|---|--------------|--------------|--------------|
| C | 1.054228990  | 0.461969090  | 1.139954000  |
| C | 0.898209180  | -0.877896570 | 0.781319320  |
| C | 0.036316370  | -1.185890980 | -0.252335610 |
| C | -0.660733440 | -0.164457310 | -0.918767340 |
| C | -0.488854730 | 1.152816550  | -0.544964130 |
| C | 0.378895680  | 1.478986250  | 0.497916460  |
| H | -1.915945170 | 0.167898270  | -2.319805480 |
| H | 1.430663650  | -1.663025020 | 1.289634710  |

|   |              |              |              |
|---|--------------|--------------|--------------|
| H | -0.115998920 | -2.201613890 | -0.563248200 |
| H | -1.020838580 | 1.937007830  | -1.052827930 |
| H | 0.503965220  | 2.510169800  | 0.779513730  |
| O | -1.469338710 | -0.551759630 | -1.901634250 |
| N | 1.996396580  | 0.797152650  | 2.268722080  |
| H | 1.709851100  | 0.347996890  | 3.126948050  |
| H | 2.013919210  | 1.792698680  | 2.432873670  |
| H | 2.938902070  | 0.502819070  | 2.055444180  |
